# Supplementary material for: Mechanism and structure–activity relationship of H2 and CO2 activation at the ZnO/Cu catalyst interface
Source: Royal Society of Chemistry journal article supplement (doi:10.1039/d4cy00604f), 2024-01-01
Supplement: d4cy00604f1.pdf [file d4cy00604f1.pdf]

## Electronic Supplementary Information

### Mechanism and structure-activity relationship of H<sub>2</sub> and CO<sub>2</sub> activations at the ZnO/Cu catalyst interface

Xin Xin,<sup>ab</sup> Peng Gao,<sup>\*abc</sup> and Shenggang Li<sup>\*abcd</sup>

<sup>a</sup> CAS Key Laboratory of Low-Carbon Conversion Science and Engineering,  
Shanghai Advanced Research Institute, Chinese Academy of Sciences, Shanghai  
201203, P. R. China

<sup>b</sup> University of Chinese Academy of Sciences, Beijing 100049, P. R. China

<sup>c</sup> State Key Laboratory of Low Carbon Catalysis and Carbon Dioxide Utilization,  
Shanghai Advanced Research Institute, Chinese Academy of Sciences, Shanghai  
201210, China

<sup>d</sup> School of Physical Science and Technology, ShanghaiTech University, Shanghai  
201210, P. R.

*\*Corresponding author. Tel: +86-021-20350994.*

*E-mail: gaopeng@sari.ac.cn (P. Gao), lisg@sari.ac.cn (S. Li).*

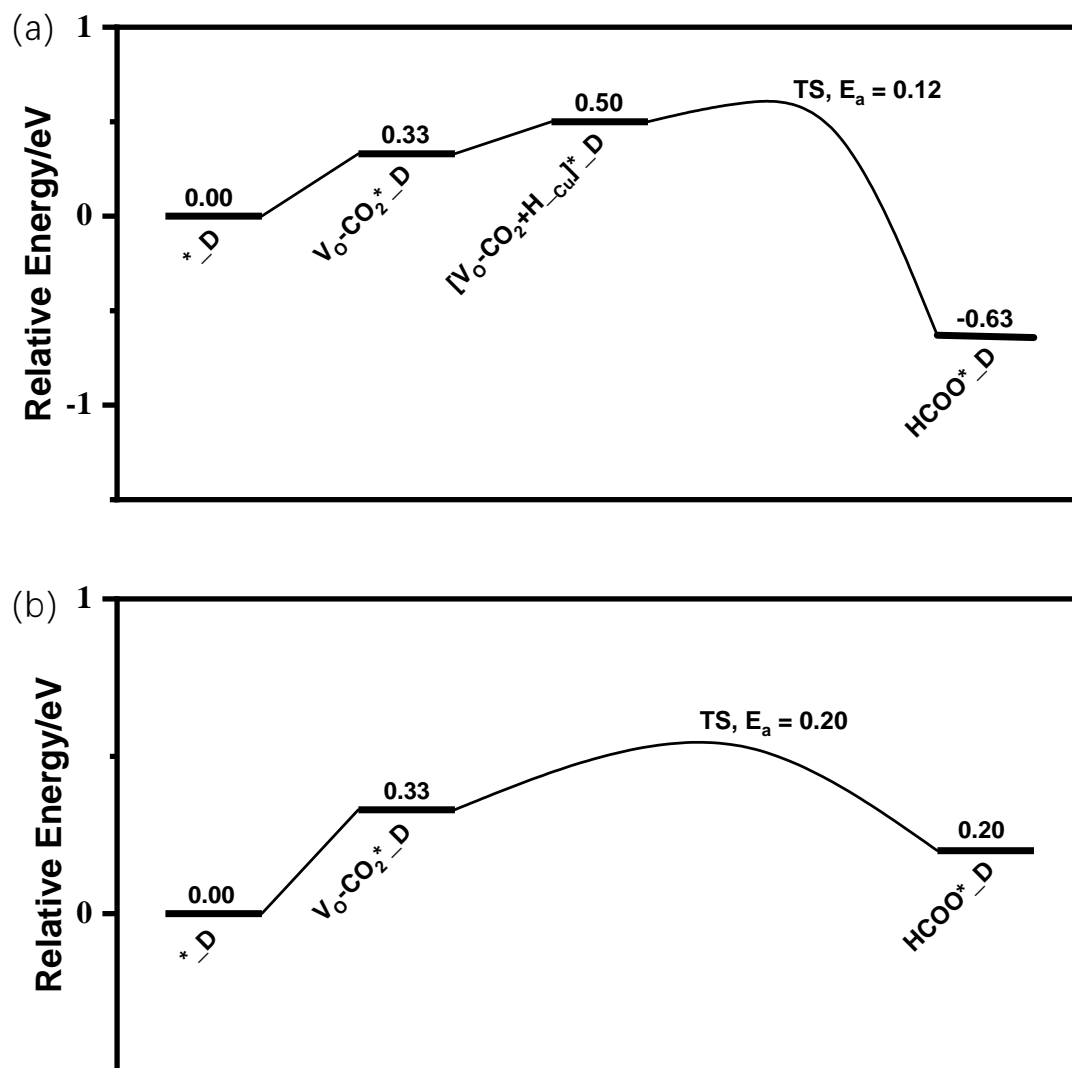

**Fig. S1** Potential energy profiles for  $V_O\text{-CO}_2^*$  (a) hydrogenation to the  $\text{HCOO}^*$  intermediate and (b) direct dissociation over the defective  $W_3^1(111)$  surface involving five Cu layers.

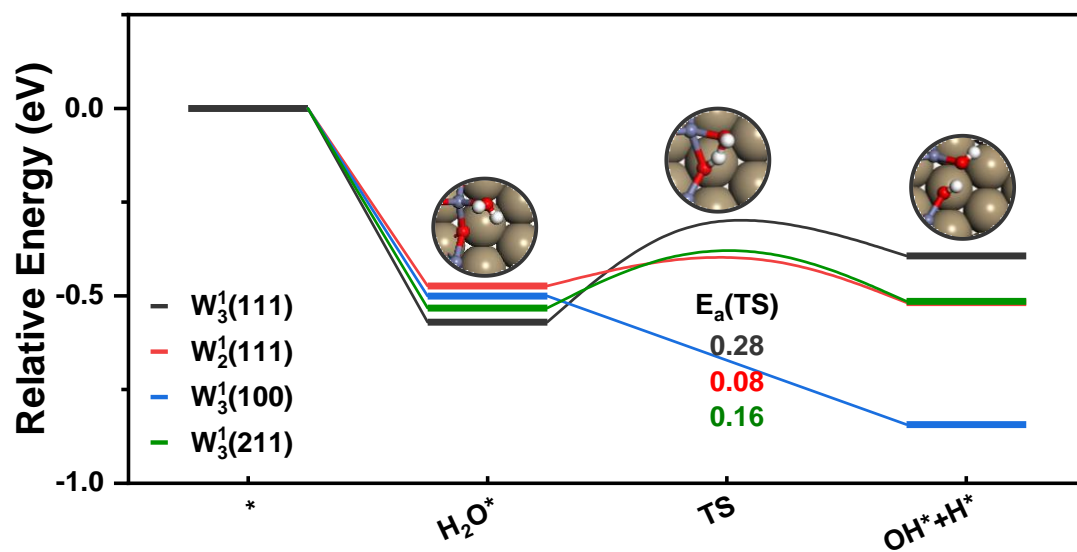

Fig. S2 Potential energy profiles for  $\text{H}_2\text{O}$  dissociation on the different ZnO/Cu catalyst models. The images display structures of the intermediates and transition states on the perfect  $W_3^1(111)$  surface.

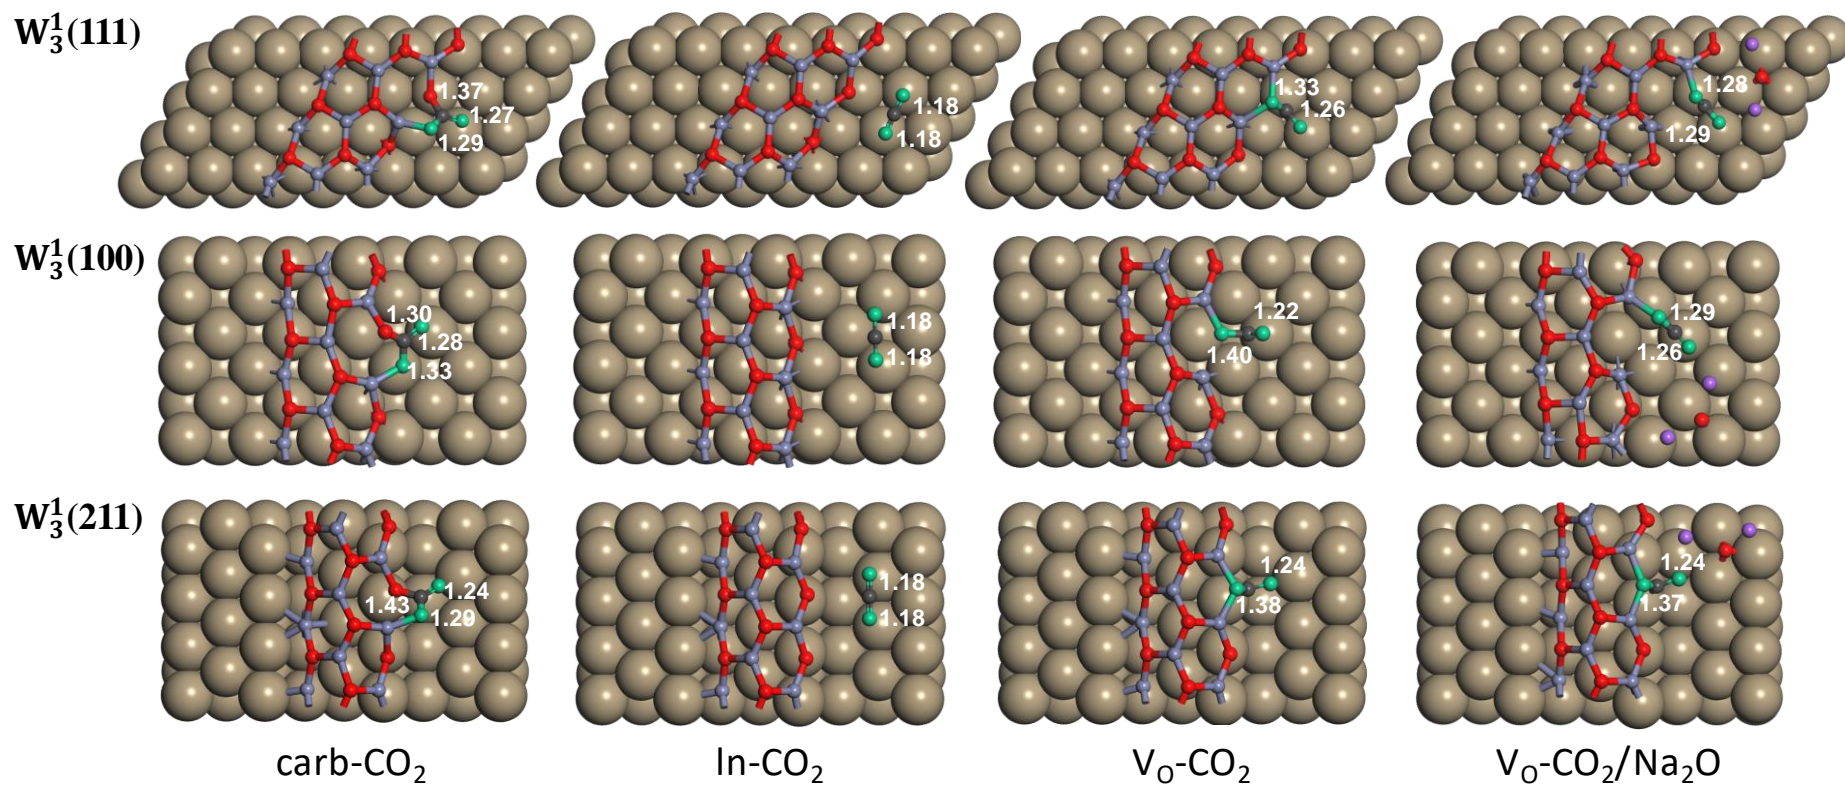

**Fig. S3** The  $CO_2$  adsorption structures on the different ZnO/Cu catalyst models containing three-column ZnO ribbons. Brown: Cu, greyish blue: Zn, red: O, dark grey: C, green: O in  $CO_2$  molecules, purple: Na.

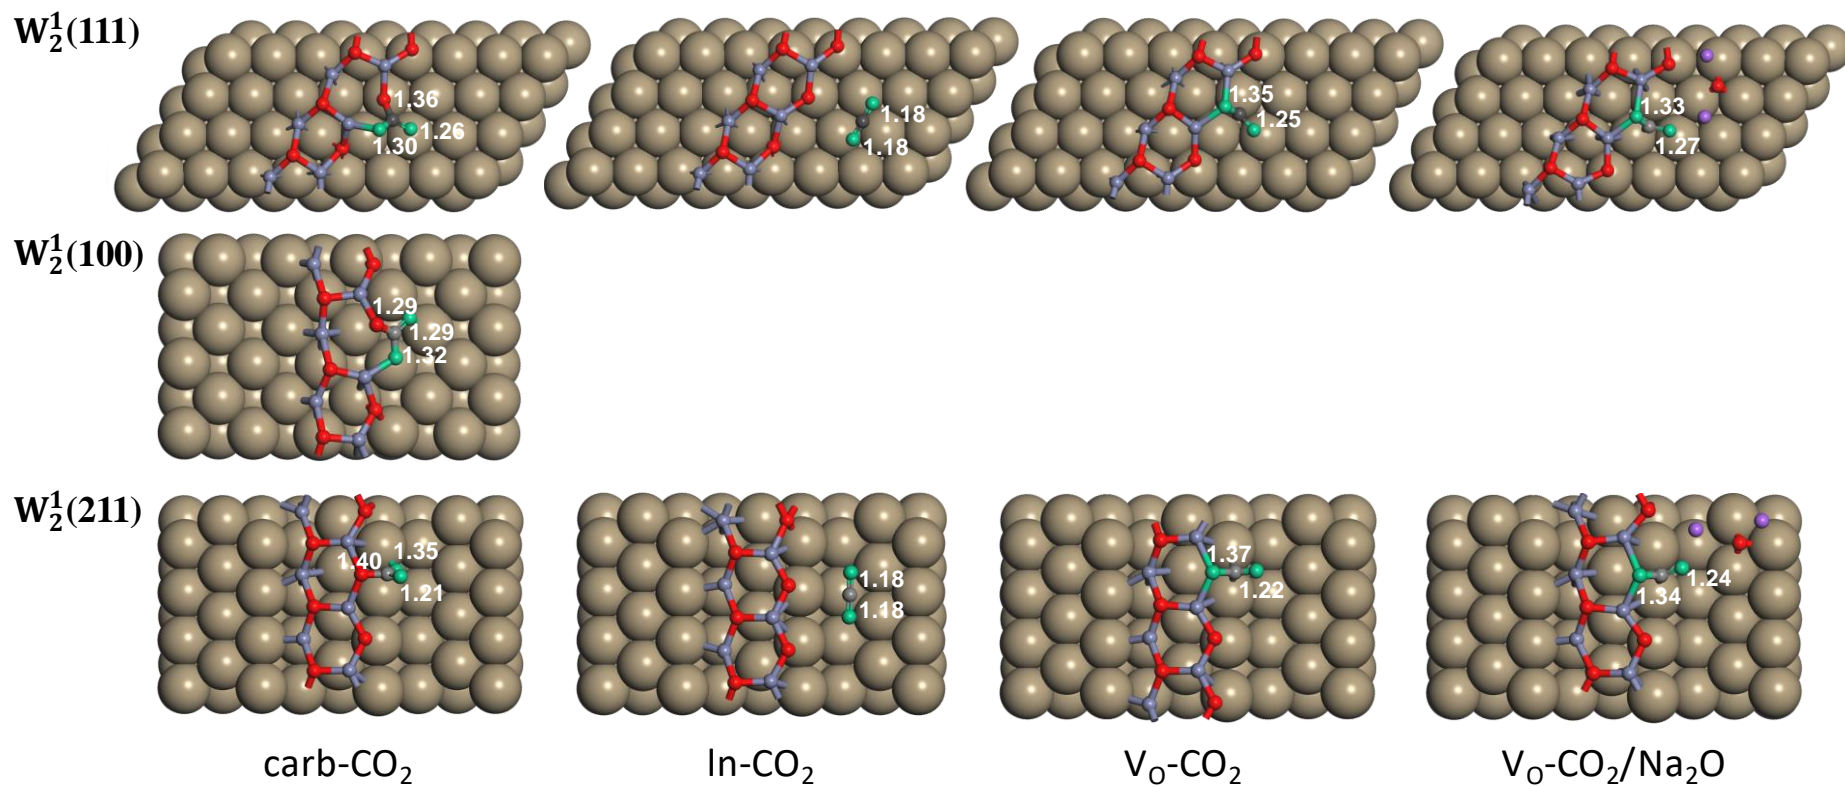

**Fig. S4** The CO<sub>2</sub> adsorption structures on the different ZnO/Cu catalyst models containing two-column ZnO ribbons. Brown: Cu, greyish blue: Zn, red: O, dark grey: C, green: O in CO<sub>2</sub> molecules, purple: Na.

**Table S1.** Activation energies ( $E_a$ , eV) and reaction energies ( $E_r$ , eV) of  $H_2$  dissociation at the ZnO/Cu interface and the Cu surface.

|              | Interface |       | Cu surface |       |
|--------------|-----------|-------|------------|-------|
|              | $E_a$     | $E_r$ | $E_a$      | $E_r$ |
| $W_3^1(111)$ | 0.26      | -0.96 | 0.47       | -0.05 |
| $W_2^1(111)$ | 0.18      | -1.11 | 0.50       | 0.14  |
| $W_3^1(100)$ | 0.26      | -0.59 | 0.49       | -0.16 |
| $W_2^1(100)$ | -         | -     | 0.37       | -0.60 |
| $W_3^1(211)$ | 0.27      | -0.86 | 0.38       | -0.57 |
| $W_2^1(211)$ | 0.45      | -1.02 | 0.41       | -0.57 |

**Table S2.** The average formation energy of an  $V_O$  site in different ZnO ribbons with gas phase  $O_2$  ( $\Delta E_{f,V_O,O_2}$ ) or  $H_2/H_2O$  ( $\Delta E_{f,V_O,H_2/H_2O}$ ) as the reference state. The ZnO ribbons from the right to the left are represented as the first, second, or third column of ZnO ribbons, respectively.

| Reference State      | Surface      | Number of Columns of ZnO Ribbons |       |       |
|----------------------|--------------|----------------------------------|-------|-------|
|                      |              | One                              | Two   | Three |
| Gas phase $O_2$      | $W_3^1(111)$ | 2.94                             | 3.99  | 3.54  |
|                      | $W_2^1(111)$ | 3.05                             | 3.52  |       |
|                      | $W_3^1(100)$ | 2.81                             | -     | -     |
|                      | $W_3^1(211)$ | 3.27                             | 4.16  | -     |
|                      | $W_2^1(211)$ | 3.00                             | 2.92  |       |
| Gas phase $H_2/H_2O$ | $W_3^1(111)$ | -0.14                            | 0.90  | 0.45  |
|                      | $W_2^1(111)$ | -0.04                            | 0.43  |       |
|                      | $W_3^1(100)$ | -0.28                            | -     | -     |
|                      | $W_3^1(211)$ | 0.18                             | 1.07  | -     |
|                      | $W_2^1(211)$ | -0.09                            | -0.17 |       |

**Table S3.** Activation energies ( $E_a$ , eV) and reaction energies ( $E_r$ , eV) for  $H_2O$  dissociation on ZnO ribbons to form Brønsted sites, and hydrogen spillover to form Brønsted acid sites ( $H_{sp1}$ ),  $H_2O$  molecules ( $H_{sp2}$ ).

|                                       | <b>H<sub>2</sub>O dissociation</b> |                      | <b>H<sub>sp1</sub></b> |                      | <b>H<sub>sp2</sub></b> |                      |
|---------------------------------------|------------------------------------|----------------------|------------------------|----------------------|------------------------|----------------------|
|                                       | <b>E<sub>a</sub></b>               | <b>E<sub>r</sub></b> | <b>E<sub>a</sub></b>   | <b>E<sub>r</sub></b> | <b>E<sub>a</sub></b>   | <b>E<sub>r</sub></b> |
| <b>W<sub>3</sub><sup>1</sup>(111)</b> | 0.28                               | 0.18                 | 0.74                   | -0.55                | 0.94                   | 0.35                 |
| <b>W<sub>2</sub><sup>1</sup>(111)</b> | 0.08                               | -0.04                | 0.50                   | -0.83                | 0.91                   | 0.44                 |
| <b>W<sub>3</sub><sup>1</sup>(100)</b> | -                                  | -0.34                | 0.60                   | -0.49                | 0.87                   | -0.15                |
| <b>W<sub>3</sub><sup>1</sup>(211)</b> | 0.16                               | 0.02                 | 1.08                   | -0.26                | 0.86                   | 0.69                 |
| <b>W<sub>2</sub><sup>1</sup>(211)</b> | -                                  | -                    | 1.08                   | -0.50                | 0.79                   | 0.42                 |



**Table S4.** Alterations in the Bader charges of Zn, Cu, and O atoms around the adsorption molecules before and after adsorbing CO<sub>2</sub>.

|                                       | carb-CO <sub>2</sub> |      |       | V <sub>o</sub> -CO <sub>2</sub> |             |
|---------------------------------------|----------------------|------|-------|---------------------------------|-------------|
|                                       | Cu                   | Zn   | O     | Cu                              | Zn          |
| <b>W<sub>3</sub><sup>1</sup>(111)</b> | 0.17                 | 0.11 | -0.09 | 0.22 / 0.13                     | 0.29 / 0.23 |
| <b>W<sub>2</sub><sup>1</sup>(111)</b> | 0.19                 | 0.08 | -0.10 | 0.20 / 0.17                     | 0.28 / 0.26 |
| <b>W<sub>3</sub><sup>1</sup>(100)</b> | 0.17 / -0.02         | 0.07 | -0.05 | 0.16                            | 0.38        |
| <b>W<sub>2</sub><sup>1</sup>(100)</b> | 0.18 / 0.01          | 0.05 | -0.05 | -                               | -           |
| <b>W<sub>3</sub><sup>1</sup>(211)</b> | -                    | 0.06 | -0.01 | 0.19                            | 0.38 / 0.32 |
| <b>W<sub>2</sub><sup>1</sup>(211)</b> | 0.02 / -0.05         | -    | -0.08 | 0.17 / 0.13                     | 0.25 / 0.25 |

**Table S5.** Calculated Bader charges of ZnO and Cu before and after adsorbing CO<sub>2</sub> molecules, and Bader charges for the CO<sub>2</sub> adsorbate in different ZnO/Cu catalyst models.

|                                       | carb-CO <sub>2</sub> |        |       |        |       | V <sub>o</sub> -CO <sub>2</sub> |        |       |        |       |
|---------------------------------------|----------------------|--------|-------|--------|-------|---------------------------------|--------|-------|--------|-------|
|                                       | CO <sub>2</sub>      | ZnO    |       | Cu     |       | CO <sub>2</sub>                 | ZnO    |       | Cu     |       |
|                                       |                      | before | after | before | after |                                 | before | after | before | after |
| <b>W<sub>3</sub><sup>1</sup>(111)</b> | -0.18                | -0.68  | -0.69 | 0.68   | 0.87  | -0.99                           | -0.10  | 0.40  | 0.10   | 0.59  |
| <b>W<sub>2</sub><sup>1</sup>(111)</b> | -0.16                | -0.63  | -0.74 | 0.63   | 0.90  | -1.03                           | -0.05  | 0.45  | 0.05   | 0.58  |
| <b>W<sub>3</sub><sup>1</sup>(100)</b> | -0.18                | -1.01  | -0.99 | 1.00   | 1.17  | -0.98                           | -0.55  | -0.05 | 0.55   | 1.03  |
| <b>W<sub>2</sub><sup>1</sup>(100)</b> | -0.18                | -0.90  | -0.97 | 0.90   | 1.14  | -                               | -      | -     | -      | -     |
| <b>W<sub>3</sub><sup>1</sup>(211)</b> | -0.24                | -0.74  | -0.70 | 0.74   | 0.94  | -1.03                           | -0.32  | 0.31  | 0.32   | 0.71  |
| <b>W<sub>2</sub><sup>1</sup>(211)</b> | -0.11                | -0.76  | -0.78 | 0.76   | 0.89  | -0.92                           | -0.11  | 0.33  | 0.11   | 0.59  |

**Table S6.** Adsorption energies ( $E_{\text{ads}}$ , eV) of  $\text{CO}_2$  molecules in different ZnO/Cu catalyst models.

|                     | carb- $\text{CO}_2$ | In- $\text{CO}_2$ | $\text{V}_\text{O}$ - $\text{CO}_2$ | $\text{V}_\text{O}$ - $\text{CO}_2/\text{Na}_2\text{O}$ |
|---------------------|---------------------|-------------------|-------------------------------------|---------------------------------------------------------|
| $\text{W}_3^1(111)$ | -0.29               | -0.08             | 0.31                                | -0.04                                                   |
| $\text{W}_2^1(111)$ | -0.38               | -0.06             | 0.07                                | -0.33                                                   |
| $\text{W}_3^1(100)$ | -0.91               | -0.06             | 0.60                                | -0.12                                                   |
| $\text{W}_2^1(100)$ | -1.19               | -                 | -                                   | -                                                       |
| $\text{W}_3^1(211)$ | -0.11               | -0.08             | 0.02                                | 0.01                                                    |
| $\text{W}_2^1(211)$ | -0.20               | -0.07             | -0.08                               | -0.27                                                   |

**Table S7.** Activation energies ( $E_a$ , eV) and reaction energies ( $E_r$ , eV) of  $\text{CO}_2^*$  hydrogenation to  $\text{HCOO}^*$  intermediates.

|                     | carb- $\text{CO}_2$ |       | $\text{V}_\text{O}$ - $\text{CO}_2$ |       | In- $\text{CO}_2$ ( $\text{H}_\text{o}$ ) |       | In- $\text{CO}_2$ ( $\text{H}_\text{zn}$ ) |       |
|---------------------|---------------------|-------|-------------------------------------|-------|-------------------------------------------|-------|--------------------------------------------|-------|
|                     | $E_a$               | $E_r$ | $E_a$                               | $E_r$ | $E_a$                                     | $E_r$ | $E_a$                                      | $E_r$ |
| $\text{W}_3^1(111)$ | 2.02                | -0.53 | 0.18                                | -0.84 | 1.62                                      | 0.26  | 0.26                                       | -1.05 |
| $\text{W}_2^1(111)$ | 2.18                | -0.33 | 0.25                                | -0.98 | 1.64                                      | 0.44  | 0.34                                       | -0.91 |
| $\text{W}_3^1(100)$ | -                   | -     | -                                   | -1.18 | 1.42                                      | -0.05 | 0.24                                       | -1.25 |
| $\text{W}_3^1(211)$ | 2.00                | -0.05 | 0.30                                | -1.49 | -                                         | 0.03  | -                                          | -     |

**Table S8.** Activation energies ( $E_a$ , eV) and reaction energies ( $E_r$ , eV) of  $V_O$ - $CO_2^*$  direct dissociation.

|              | $E_a$ | $E_r$ |
|--------------|-------|-------|
| $W_3^1(111)$ | 0.25  | -0.23 |
| $W_2^1(111)$ | 0.29  | -0.01 |
| $W_3^1(100)$ | 0.10  | -0.30 |
| $W_3^1(211)$ | 0.63  | -0.34 |

**Table S9.** Activation energies ( $E_a$ , eV) and reaction energies ( $E_r$ , eV) of  $\text{CO}_2^*$  hydrogenation to  $\text{COOH}^*$  intermediates.

|                                                   |                                             | $W_3^1(111)$ |       | $W_2^1(111)$ |       | $W_3^1(211)$ |       |
|---------------------------------------------------|---------------------------------------------|--------------|-------|--------------|-------|--------------|-------|
|                                                   |                                             | $E_a$        | $E_r$ | $E_a$        | $E_r$ | $E_a$        | $E_r$ |
| <b>carb-<math>\text{CO}_2</math></b>              | $\text{CO}_2+\text{H}--\text{CO}_3\text{H}$ | 0.54         | -0.27 | 0.56         | -0.38 | 0.32         | -0.23 |
|                                                   | $\text{CO}_3\text{H}--\text{O}+\text{COOH}$ | 1.82         | 0.98  | -            | 1.34  | 1.75         | 0.62  |
| <b><math>\text{V}_\text{O}-\text{CO}_2</math></b> | $\text{CO}_2+\text{H}--\text{COOH}$         | 0.63         | -0.39 | 1.29         | -0.05 | -            | -0.52 |
| <b>In-<math>\text{CO}_2</math></b>                | $\text{CO}_2+\text{H}--\text{COOH}$         | 1.42         | -0.11 | 1.52         | -0.06 | 1.14         | -0.73 |

**Table S10.** Optimized fractional coordinates of the perfect  $W_3^1(111)$  surface.

Cu Zn O

|                     |                     |                      |
|---------------------|---------------------|----------------------|
| 1.0000000000000000  |                     |                      |
| 7.2781844327311198  | -7.2781844327311198 | 0.0000000000000021   |
| 0.0000000000000000  | 14.5563688654622005 | -14.5563688654622005 |
| 11.0863155154214006 | 11.0863155154214006 | 11.0863155154214006  |

|    |    |   |
|----|----|---|
| Cu | Zn | O |
| 96 | 9  | 9 |

Selective dynamics

Direct

|                    |                    |                    |   |   |   |
|--------------------|--------------------|--------------------|---|---|---|
| 0.4333333348234518 | 0.1333333340783938 | 0.2603887055110903 | F | F | F |
| 0.266666681567804  | 0.216666674117224  | 0.3698056472444549 | F | F | F |
| 0.0981646714670812 | 0.0483035863947546 | 0.4776453291772750 | T | T | T |
| 0.1833333348234518 | 0.1333333340783938 | 0.2603887055110903 | F | F | F |
| 0.016666681567804  | 0.216666674117224  | 0.3698056472444549 | F | F | F |
| 0.3487443234960825 | 0.0489324659027091 | 0.4771937014502404 | T | T | T |
| 0.1833333348234518 | 0.0083333340783938 | 0.2603887055110903 | F | F | F |
| 0.016666681567804  | 0.091666674117224  | 0.3698056472444549 | F | F | F |
| 0.3460315756805677 | 0.1716959448561630 | 0.4764433970836114 | T | T | T |
| 0.4333333348234518 | 0.0083333340783938 | 0.2603887055110903 | F | F | F |
| 0.266666681567804  | 0.091666674117224  | 0.3698056472444549 | F | F | F |
| 0.0954005974312093 | 0.1705960355359606 | 0.4765686076536646 | T | T | T |
| 0.9333333348234518 | 0.1333333340783938 | 0.2603887055110903 | F | F | F |
| 0.766666681567804  | 0.216666674117224  | 0.3698056472444549 | F | F | F |
| 0.5991926513908985 | 0.0489701522733846 | 0.4774756275745020 | T | T | T |
| 0.6833333348234518 | 0.1333333340783938 | 0.2603887055110903 | F | F | F |
| 0.516666681567804  | 0.216666674117224  | 0.3698056472444549 | F | F | F |
| 0.8481436837675822 | 0.0483283594851906 | 0.4778177195782081 | T | T | T |

|                    |                    |                    |   |   |   |
|--------------------|--------------------|--------------------|---|---|---|
| 0.6833333348234518 | 0.0083333340783938 | 0.2603887055110903 | F | F | F |
| 0.5166666681567804 | 0.0916666674117224 | 0.3698056472444549 | F | F | F |
| 0.8468702246791097 | 0.1717695933709704 | 0.4765859215102015 | T | T | T |
| 0.9333333348234518 | 0.0083333340783938 | 0.2603887055110903 | F | F | F |
| 0.7666666681567804 | 0.0916666674117224 | 0.3698056472444549 | F | F | F |
| 0.5971561019675741 | 0.1723878783136912 | 0.4759763336100490 | T | T | T |
| 0.4333333348234518 | 0.3833333340783938 | 0.2603887055110903 | F | F | F |
| 0.2666666681567804 | 0.4666666674117224 | 0.3698056472444549 | F | F | F |
| 0.0986822803676810 | 0.2962337319372155 | 0.4763760341529480 | T | T | T |
| 0.1833333348234518 | 0.3833333340783938 | 0.2603887055110903 | F | F | F |
| 0.0166666681567804 | 0.4666666674117224 | 0.3698056472444549 | F | F | F |
| 0.3433483099395205 | 0.2958177690365216 | 0.4761649451332490 | T | T | T |
| 0.1833333348234518 | 0.2583333340783938 | 0.2603887055110903 | F | F | F |
| 0.0166666681567804 | 0.3416666674117224 | 0.3698056472444549 | F | F | F |
| 0.3514628684467578 | 0.4266806873090781 | 0.4802351096770556 | T | T | T |
| 0.4333333348234518 | 0.2583333340783938 | 0.2603887055110903 | F | F | F |
| 0.2666666681567804 | 0.3416666674117224 | 0.3698056472444549 | F | F | F |
| 0.1020909845988223 | 0.4291078398044496 | 0.4749011506468026 | T | T | T |
| 0.9333333348234518 | 0.3833333340783938 | 0.2603887055110903 | F | F | F |
| 0.7666666681567804 | 0.4666666674117224 | 0.3698056472444549 | F | F | F |
| 0.5951514523242950 | 0.2983673016167031 | 0.4813562518058496 | T | T | T |
| 0.6833333348234518 | 0.3833333340783938 | 0.2603887055110903 | F | F | F |
| 0.5166666681567804 | 0.4666666674117224 | 0.3698056472444549 | F | F | F |
| 0.8535715553061342 | 0.2993483373743131 | 0.4821862268134275 | T | T | T |
| 0.6833333348234518 | 0.2583333340783938 | 0.2603887055110903 | F | F | F |
| 0.5166666681567804 | 0.3416666674117224 | 0.3698056472444549 | F | F | F |
| 0.8545731407570275 | 0.4295540069056369 | 0.4748301994250489 | T | T | T |
| 0.9333333348234518 | 0.2583333340783938 | 0.2603887055110903 | F | F | F |



|                    |                    |                    |   |   |   |
|--------------------|--------------------|--------------------|---|---|---|
| 0.766666681567804  | 0.3416666674117224 | 0.3698056472444549 | F | F | F |
| 0.6049274950895664 | 0.4282920052923395 | 0.4750516412450813 | T | T | T |
| 0.4333333348234518 | 0.6333333340783938 | 0.2603887055110903 | F | F | F |
| 0.266666681567804  | 0.7166666674117224 | 0.3698056472444549 | F | F | F |
| 0.1028769264883711 | 0.5535911781386728 | 0.4800269157376276 | T | T | T |
| 0.1833333348234518 | 0.6333333340783938 | 0.2603887055110903 | F | F | F |
| 0.016666681567804  | 0.7166666674117224 | 0.3698056472444549 | F | F | F |
| 0.3505185368689391 | 0.5508162848492969 | 0.4759871646688155 | T | T | T |
| 0.1833333348234518 | 0.5083333340783938 | 0.2603887055110903 | F | F | F |
| 0.016666681567804  | 0.5916666674117224 | 0.3698056472444549 | F | F | F |
| 0.3539492865609410 | 0.6768881039741240 | 0.4783429474750560 | T | T | T |
| 0.4333333348234518 | 0.5083333340783938 | 0.2603887055110903 | F | F | F |
| 0.266666681567804  | 0.5916666674117224 | 0.3698056472444549 | F | F | F |
| 0.1026067360805810 | 0.6779522528410653 | 0.4755024092636079 | T | T | T |
| 0.9333333348234518 | 0.6333333340783938 | 0.2603887055110903 | F | F | F |
| 0.766666681567804  | 0.7166666674117224 | 0.3698056472444549 | F | F | F |
| 0.6005888925509895 | 0.5505290375174162 | 0.4758931248160439 | T | T | T |
| 0.6833333348234518 | 0.6333333340783938 | 0.2603887055110903 | F | F | F |
| 0.516666681567804  | 0.7166666674117224 | 0.3698056472444549 | F | F | F |
| 0.8534701935172770 | 0.5533441843443703 | 0.4797690665776332 | T | T | T |
| 0.6833333348234518 | 0.5083333340783938 | 0.2603887055110903 | F | F | F |
| 0.516666681567804  | 0.5916666674117224 | 0.3698056472444549 | F | F | F |
| 0.8492379033644837 | 0.6765889327167549 | 0.4784015082739800 | T | T | T |
| 0.9333333348234518 | 0.5083333340783938 | 0.2603887055110903 | F | F | F |
| 0.766666681567804  | 0.5916666674117224 | 0.3698056472444549 | F | F | F |
| 0.6000230064074920 | 0.6748810399577471 | 0.4835844368619936 | T | T | T |
| 0.4333333348234518 | 0.8833333340783938 | 0.2603887055110903 | F | F | F |
| 0.266666681567804  | 0.9666666674117224 | 0.3698056472444549 | F | F | F |

|                    |                    |                    |   |   |   |
|--------------------|--------------------|--------------------|---|---|---|
| 0.1002589874401920 | 0.8009014545957175 | 0.4775233262227879 | T | T | T |
| 0.1833333348234518 | 0.8833333340783938 | 0.2603887055110903 | F | F | F |
| 0.0166666681567804 | 0.9666666674117224 | 0.3698056472444549 | F | F | F |
| 0.3508368376284886 | 0.8007382575588180 | 0.4775804946494860 | T | T | T |
| 0.1833333348234518 | 0.7583333340783938 | 0.2603887055110903 | F | F | F |
| 0.0166666681567804 | 0.8416666674117224 | 0.3698056472444549 | F | F | F |
| 0.3497931643365463 | 0.9250944451668931 | 0.4776890034780836 | T | T | T |
| 0.4333333348234518 | 0.7583333340783938 | 0.2603887055110903 | F | F | F |
| 0.2666666681567804 | 0.8416666674117224 | 0.3698056472444549 | F | F | F |
| 0.0998239620963447 | 0.9248137931198505 | 0.4775557167544986 | T | T | T |
| 0.9333333348234518 | 0.8833333340783938 | 0.2603887055110903 | F | F | F |
| 0.7666666681567804 | 0.9666666674117224 | 0.3698056472444549 | F | F | F |
| 0.6004181774437426 | 0.8000388439115402 | 0.4785207232328113 | T | T | T |
| 0.6833333348234518 | 0.8833333340783938 | 0.2603887055110903 | F | F | F |
| 0.5166666681567804 | 0.9666666674117224 | 0.3698056472444549 | F | F | F |
| 0.8497761489449432 | 0.8001922416899599 | 0.4784314701435585 | T | T | T |
| 0.6833333348234518 | 0.7583333340783938 | 0.2603887055110903 | F | F | F |
| 0.5166666681567804 | 0.8416666674117224 | 0.3698056472444549 | F | F | F |
| 0.8493558816628917 | 0.9244066838750039 | 0.4775457238151104 | T | T | T |
| 0.9333333348234518 | 0.7583333340783938 | 0.2603887055110903 | F | F | F |
| 0.7666666681567804 | 0.8416666674117224 | 0.3698056472444549 | F | F | F |
| 0.5990497855313172 | 0.9244355333031697 | 0.4775527790309160 | T | T | T |
| 0.1170049260631350 | 0.3668698497640711 | 0.6001691758104420 | T | T | T |
| 0.4613690731396889 | 0.3679749818682604 | 0.5995210573259718 | T | T | T |
| 0.7859461390067741 | 0.3626134519973652 | 0.6074321390011312 | T | T | T |
| 0.0850612251593079 | 0.4948288638276537 | 0.6580008253315653 | T | T | T |
| 0.4175800835539598 | 0.4958140543886977 | 0.6578018872278231 | T | T | T |
| 0.7486257708334596 | 0.4947480280403799 | 0.6576508951766667 | T | T | T |

|                    |                    |                    |   |   |   |
|--------------------|--------------------|--------------------|---|---|---|
| 0.0345806852683839 | 0.6125877211752440 | 0.5914573586394535 | T | T | T |
| 0.3772901575237878 | 0.6202198928221470 | 0.5918545325520166 | T | T | T |
| 0.7065926151595161 | 0.6204316241055603 | 0.5918735629951133 | T | T | T |
| 0.2640468450068872 | 0.3419252213898856 | 0.5603160954574425 | T | T | T |
| 0.5839114871431249 | 0.3258505063399483 | 0.5789630992789163 | T | T | T |
| 0.9092164490821432 | 0.3222050821569276 | 0.5812715275596267 | T | T | T |
| 0.2055067348669325 | 0.4490870238268466 | 0.6616278241051162 | T | T | T |
| 0.5367738597718736 | 0.4494092800486319 | 0.6617574458103025 | T | T | T |
| 0.8734043928932638 | 0.4512416698145873 | 0.6617295215524164 | T | T | T |
| 0.1877580742707126 | 0.5977074870968594 | 0.6308055570055894 | T | T | T |
| 0.5210292438188420 | 0.5994385719664472 | 0.6337172388777985 | T | T | T |
| 0.8512998959951037 | 0.5977080185239078 | 0.6304491603226000 | T | T | T |

**Table S11.** Optimized fractional coordinates of the defective  $W_3^1(111)$  surface.

Cu Zn O

|                     |                     |                      |
|---------------------|---------------------|----------------------|
| 1.0000000000000000  |                     |                      |
| 7.2781844327311198  | -7.2781844327311198 | 0.0000000000000021   |
| 0.0000000000000000  | 14.5563688654622005 | -14.5563688654622005 |
| 11.0863155154214006 | 11.0863155154214006 | 11.0863155154214006  |

|    |    |   |
|----|----|---|
| Cu | Zn | O |
| 96 | 9  | 8 |

Selective dynamics

Direct

|                    |                    |                    |   |   |   |
|--------------------|--------------------|--------------------|---|---|---|
| 0.4333333348234518 | 0.1333333340783938 | 0.2603887055110903 | F | F | F |
| 0.266666681567804  | 0.2166666674117224 | 0.3698056472444549 | F | F | F |
| 0.1006266495334624 | 0.0492360764108589 | 0.4779699134167392 | T | T | T |
| 0.1833333348234518 | 0.1333333340783938 | 0.2603887055110903 | F | F | F |
| 0.016666681567804  | 0.2166666674117224 | 0.3698056472444549 | F | F | F |
| 0.3503315571336756 | 0.0495268541664365 | 0.4774736900966934 | T | T | T |
| 0.1833333348234518 | 0.0083333340783938 | 0.2603887055110903 | F | F | F |
| 0.016666681567804  | 0.0916666674117224 | 0.3698056472444549 | F | F | F |
| 0.3517350620389356 | 0.1738537511750372 | 0.4775529417985777 | T | T | T |
| 0.4333333348234518 | 0.0083333340783938 | 0.2603887055110903 | F | F | F |
| 0.266666681567804  | 0.0916666674117224 | 0.3698056472444549 | F | F | F |
| 0.0997913518899065 | 0.1719330478532855 | 0.4766107360632020 | T | T | T |
| 0.9333333348234518 | 0.1333333340783938 | 0.2603887055110903 | F | F | F |
| 0.766666681567804  | 0.2166666674117224 | 0.3698056472444549 | F | F | F |
| 0.6003885457610567 | 0.0495008580546565 | 0.4772408570973496 | T | T | T |
| 0.6833333348234518 | 0.1333333340783938 | 0.2603887055110903 | F | F | F |
| 0.516666681567804  | 0.2166666674117224 | 0.3698056472444549 | F | F | F |
| 0.8506792247381759 | 0.0492323442470666 | 0.4776929674227565 | T | T | T |

|                    |                    |                    |   |   |   |
|--------------------|--------------------|--------------------|---|---|---|
| 0.6833333348234518 | 0.0083333340783938 | 0.2603887055110903 | F | F | F |
| 0.5166666681567804 | 0.0916666674117224 | 0.3698056472444549 | F | F | F |
| 0.8481625904728100 | 0.1724325670577527 | 0.4760313600187225 | T | T | T |
| 0.9333333348234518 | 0.0083333340783938 | 0.2603887055110903 | F | F | F |
| 0.7666666681567804 | 0.0916666674117224 | 0.3698056472444549 | F | F | F |
| 0.5986071220371982 | 0.1738585864930722 | 0.4766557149716836 | T | T | T |
| 0.4333333348234518 | 0.3833333340783938 | 0.2603887055110903 | F | F | F |
| 0.2666666681567804 | 0.4666666674117224 | 0.3698056472444549 | F | F | F |
| 0.1045063298987363 | 0.2977796093337278 | 0.4793812370931029 | T | T | T |
| 0.1833333348234518 | 0.3833333340783938 | 0.2603887055110903 | F | F | F |
| 0.0166666681567804 | 0.4666666674117224 | 0.3698056472444549 | F | F | F |
| 0.3555733690920750 | 0.2973692722290783 | 0.4759616445934213 | T | T | T |
| 0.1833333348234518 | 0.2583333340783938 | 0.2603887055110903 | F | F | F |
| 0.0166666681567804 | 0.3416666674117224 | 0.3698056472444549 | F | F | F |
| 0.3527277160163685 | 0.4274318414112787 | 0.4751206596760291 | T | T | T |
| 0.4333333348234518 | 0.2583333340783938 | 0.2603887055110903 | F | F | F |
| 0.2666666681567804 | 0.3416666674117224 | 0.3698056472444549 | F | F | F |
| 0.1030349823258038 | 0.4291971317533023 | 0.4753948496406077 | T | T | T |
| 0.9333333348234518 | 0.3833333340783938 | 0.2603887055110903 | F | F | F |
| 0.7666666681567804 | 0.4666666674117224 | 0.3698056472444549 | F | F | F |
| 0.6029794345702321 | 0.3019344046505932 | 0.4807426127429861 | T | T | T |
| 0.6833333348234518 | 0.3833333340783938 | 0.2603887055110903 | F | F | F |
| 0.5166666681567804 | 0.4666666674117224 | 0.3698056472444549 | F | F | F |
| 0.8523756837818377 | 0.2993628886897721 | 0.4830021851705449 | T | T | T |
| 0.6833333348234518 | 0.2583333340783938 | 0.2603887055110903 | F | F | F |
| 0.5166666681567804 | 0.3416666674117224 | 0.3698056472444549 | F | F | F |
| 0.8526490789180817 | 0.4289932423690016 | 0.4738354799765379 | T | T | T |
| 0.9333333348234518 | 0.2583333340783938 | 0.2603887055110903 | F | F | F |

|                    |                    |                    |   |   |   |
|--------------------|--------------------|--------------------|---|---|---|
| 0.766666681567804  | 0.3416666674117224 | 0.3698056472444549 | F | F | F |
| 0.6014786923330806 | 0.4240160818242502 | 0.4813066382018281 | T | T | T |
| 0.4333333348234518 | 0.6333333340783938 | 0.2603887055110903 | F | F | F |
| 0.266666681567804  | 0.7166666674117224 | 0.3698056472444549 | F | F | F |
| 0.1042233473851805 | 0.5538565709712122 | 0.4812592626417505 | T | T | T |
| 0.1833333348234518 | 0.6333333340783938 | 0.2603887055110903 | F | F | F |
| 0.016666681567804  | 0.7166666674117224 | 0.3698056472444549 | F | F | F |
| 0.3512875378753925 | 0.5514484139702434 | 0.4767921558371549 | T | T | T |
| 0.1833333348234518 | 0.5083333340783938 | 0.2603887055110903 | F | F | F |
| 0.016666681567804  | 0.5916666674117224 | 0.3698056472444549 | F | F | F |
| 0.3545485306208737 | 0.6772992310979387 | 0.4773331202375017 | T | T | T |
| 0.4333333348234518 | 0.5083333340783938 | 0.2603887055110903 | F | F | F |
| 0.266666681567804  | 0.5916666674117224 | 0.3698056472444549 | F | F | F |
| 0.1024050174355239 | 0.6776148498384313 | 0.4760819648657865 | T | T | T |
| 0.9333333348234518 | 0.6333333340783938 | 0.2603887055110903 | F | F | F |
| 0.766666681567804  | 0.7166666674117224 | 0.3698056472444549 | F | F | F |
| 0.6007801332403550 | 0.5494113518981337 | 0.4753065288840931 | T | T | T |
| 0.6833333348234518 | 0.6333333340783938 | 0.2603887055110903 | F | F | F |
| 0.516666681567804  | 0.7166666674117224 | 0.3698056472444549 | F | F | F |
| 0.8527220805940109 | 0.5524440897530241 | 0.4775718080895733 | T | T | T |
| 0.6833333348234518 | 0.5083333340783938 | 0.2603887055110903 | F | F | F |
| 0.516666681567804  | 0.5916666674117224 | 0.3698056472444549 | F | F | F |
| 0.8491140042006154 | 0.6758366840056380 | 0.4802614588670954 | T | T | T |
| 0.9333333348234518 | 0.5083333340783938 | 0.2603887055110903 | F | F | F |
| 0.766666681567804  | 0.5916666674117224 | 0.3698056472444549 | F | F | F |
| 0.6014931386401506 | 0.6749270129605995 | 0.4825790115673455 | T | T | T |
| 0.4333333348234518 | 0.8833333340783938 | 0.2603887055110903 | F | F | F |
| 0.266666681567804  | 0.9666666674117224 | 0.3698056472444549 | F | F | F |

|                    |                    |                    |   |   |   |
|--------------------|--------------------|--------------------|---|---|---|
| 0.1006087890193988 | 0.8008051820110763 | 0.4776479821109456 | T | T | T |
| 0.1833333348234518 | 0.8833333340783938 | 0.2603887055110903 | F | F | F |
| 0.0166666681567804 | 0.9666666674117224 | 0.3698056472444549 | F | F | F |
| 0.3516629074787682 | 0.8008479953609431 | 0.4772472807277717 | T | T | T |
| 0.1833333348234518 | 0.7583333340783938 | 0.2603887055110903 | F | F | F |
| 0.0166666681567804 | 0.8416666674117224 | 0.3698056472444549 | F | F | F |
| 0.3509406142448641 | 0.9251271875215823 | 0.4775461847626146 | T | T | T |
| 0.4333333348234518 | 0.7583333340783938 | 0.2603887055110903 | F | F | F |
| 0.2666666681567804 | 0.8416666674117224 | 0.3698056472444549 | F | F | F |
| 0.1007590950587306 | 0.9250705230627138 | 0.4777425105812518 | T | T | T |
| 0.9333333348234518 | 0.8833333340783938 | 0.2603887055110903 | F | F | F |
| 0.7666666681567804 | 0.9666666674117224 | 0.3698056472444549 | F | F | F |
| 0.6020256625725708 | 0.8005914563025103 | 0.4779247788080913 | T | T | T |
| 0.6833333348234518 | 0.8833333340783938 | 0.2603887055110903 | F | F | F |
| 0.5166666681567804 | 0.9666666674117224 | 0.3698056472444549 | F | F | F |
| 0.8507378454300870 | 0.8004416257350375 | 0.4785267499662863 | T | T | T |
| 0.6833333348234518 | 0.7583333340783938 | 0.2603887055110903 | F | F | F |
| 0.5166666681567804 | 0.8416666674117224 | 0.3698056472444549 | F | F | F |
| 0.8505411437210028 | 0.9249201340935099 | 0.4777038249130449 | T | T | T |
| 0.9333333348234518 | 0.7583333340783938 | 0.2603887055110903 | F | F | F |
| 0.7666666681567804 | 0.8416666674117224 | 0.3698056472444549 | F | F | F |
| 0.6002694087370668 | 0.9249809135553280 | 0.4775604762802680 | T | T | T |
| 0.0827826143370135 | 0.3583800352048273 | 0.6123618895908779 | T | T | T |
| 0.4195173629038878 | 0.3768515833420771 | 0.5837054753053763 | T | T | T |
| 0.7803500605712795 | 0.3682483163852937 | 0.5894348926449318 | T | T | T |
| 0.0542031089155223 | 0.4914088836207851 | 0.6598426220701510 | T | T | T |
| 0.3882048388101650 | 0.4931296882595395 | 0.6599357056236982 | T | T | T |
| 0.7166120391672830 | 0.4891758921407398 | 0.6525137182780192 | T | T | T |

|                    |                    |                    |   |   |   |
|--------------------|--------------------|--------------------|---|---|---|
| 0.0084713637224343 | 0.6106775694075316 | 0.5911042213159474 | T | T | T |
| 0.3448653323644562 | 0.6137428944448683 | 0.5921196311336919 | T | T | T |
| 0.6801250615048301 | 0.6182499643577068 | 0.5917323190883227 | T | T | T |
| 0.2051977341074913 | 0.3239262955537143 | 0.5717947187102388 | T | T | T |
| 0.8812282811404896 | 0.3129063479195958 | 0.5848469442526479 | T | T | T |
| 0.1761765850351912 | 0.4468024112973517 | 0.6663347752151056 | T | T | T |
| 0.5049635648007484 | 0.4442852475246244 | 0.6581295170863004 | T | T | T |
| 0.8399894737134496 | 0.4447989781777511 | 0.6565520827265096 | T | T | T |
| 0.1578512456824008 | 0.5940207940647748 | 0.6323218974192282 | T | T | T |
| 0.4931530860476321 | 0.5958872136412376 | 0.6338837156157976 | T | T | T |
| 0.8228543256558574 | 0.5935294420444542 | 0.6296940362336185 | T | T | T |



**Table S12.** Optimized fractional coordinates of the perfect  $W_2^1(111)$  surface.

Cu Zn O

1.0000000000000000  
7.2781844327311198 -7.2781844327311198 0.0000000000000021  
0.0000000000000000 14.5563688654622005 -14.5563688654622005  
11.0863155154214006 11.0863155154214006 11.0863155154214006

Cu Zn O  
96 6 6

Selective dynamics

Direct

|                    |                    |                    |   |   |   |
|--------------------|--------------------|--------------------|---|---|---|
| 0.4333333348234518 | 0.1333333340783938 | 0.2603887055110903 | F | F | F |
| 0.266666681567804  | 0.2166666674117224 | 0.3698056472444549 | F | F | F |
| 0.0990870814992694 | 0.0493598358266810 | 0.4774093576655006 | T | T | T |
| 0.1833333348234518 | 0.1333333340783938 | 0.2603887055110903 | F | F | F |
| 0.0166666681567804 | 0.2166666674117224 | 0.3698056472444549 | F | F | F |
| 0.3488845794747373 | 0.0493496359762133 | 0.4772445043973619 | T | T | T |
| 0.1833333348234518 | 0.0083333340783938 | 0.2603887055110903 | F | F | F |
| 0.0166666681567804 | 0.0916666674117224 | 0.3698056472444549 | F | F | F |
| 0.3489747125258539 | 0.1736261221324508 | 0.4772670753275712 | T | T | T |
| 0.4333333348234518 | 0.0083333340783938 | 0.2603887055110903 | F | F | F |
| 0.2666666681567804 | 0.0916666674117224 | 0.3698056472444549 | F | F | F |
| 0.0983606062436564 | 0.1729578024084532 | 0.4775938055117755 | T | T | T |
| 0.9333333348234518 | 0.1333333340783938 | 0.2603887055110903 | F | F | F |
| 0.7666666681567804 | 0.2166666674117224 | 0.3698056472444549 | F | F | F |
| 0.5988932409585539 | 0.0493325440403169 | 0.4773755653353882 | T | T | T |
| 0.6833333348234518 | 0.1333333340783938 | 0.2603887055110903 | F | F | F |
| 0.5166666681567804 | 0.2166666674117224 | 0.3698056472444549 | F | F | F |
| 0.8492989214421474 | 0.0493758467093846 | 0.4774859889527139 | T | T | T |

|                    |                    |                    |   |   |   |
|--------------------|--------------------|--------------------|---|---|---|
| 0.6833333348234518 | 0.0083333340783938 | 0.2603887055110903 | F | F | F |
| 0.5166666681567804 | 0.0916666674117224 | 0.3698056472444549 | F | F | F |
| 0.8472969507843021 | 0.1729038894937345 | 0.4776694401544668 | T | T | T |
| 0.9333333348234518 | 0.0083333340783938 | 0.2603887055110903 | F | F | F |
| 0.7666666681567804 | 0.0916666674117224 | 0.3698056472444549 | F | F | F |
| 0.5982180234351586 | 0.1736706336994095 | 0.4774131105386583 | T | T | T |
| 0.4333333348234518 | 0.3833333340783938 | 0.2603887055110903 | F | F | F |
| 0.2666666681567804 | 0.4666666674117224 | 0.3698056472444549 | F | F | F |
| 0.0949366428966389 | 0.2950347086287490 | 0.4762891628545274 | T | T | T |
| 0.1833333348234518 | 0.3833333340783938 | 0.2603887055110903 | F | F | F |
| 0.0166666681567804 | 0.4666666674117224 | 0.3698056472444549 | F | F | F |
| 0.3459506962128848 | 0.2965203892386908 | 0.4762403546652273 | T | T | T |
| 0.1833333348234518 | 0.2583333340783938 | 0.2603887055110903 | F | F | F |
| 0.0166666681567804 | 0.3416666674117224 | 0.3698056472444549 | F | F | F |
| 0.3435147292611834 | 0.4209659991844287 | 0.4760407437078521 | T | T | T |
| 0.4333333348234518 | 0.2583333340783938 | 0.2603887055110903 | F | F | F |
| 0.2666666681567804 | 0.3416666674117224 | 0.3698056472444549 | F | F | F |
| 0.0996363649495360 | 0.4212184877412821 | 0.4754033789893748 | T | T | T |
| 0.9333333348234518 | 0.3833333340783938 | 0.2603887055110903 | F | F | F |
| 0.7666666681567804 | 0.4666666674117224 | 0.3698056472444549 | F | F | F |
| 0.5976365842378035 | 0.2978804584550348 | 0.4757457197024765 | T | T | T |
| 0.6833333348234518 | 0.3833333340783938 | 0.2603887055110903 | F | F | F |
| 0.5166666681567804 | 0.4666666674117224 | 0.3698056472444549 | F | F | F |
| 0.8469229260539554 | 0.2965989617758362 | 0.4764239869400312 | T | T | T |
| 0.6833333348234518 | 0.2583333340783938 | 0.2603887055110903 | F | F | F |
| 0.5166666681567804 | 0.3416666674117224 | 0.3698056472444549 | F | F | F |
| 0.8546387948454868 | 0.4241806976424718 | 0.4841380797499185 | T | T | T |
| 0.9333333348234518 | 0.2583333340783938 | 0.2603887055110903 | F | F | F |

|                    |                    |                    |   |   |   |
|--------------------|--------------------|--------------------|---|---|---|
| 0.766666681567804  | 0.3416666674117224 | 0.3698056472444549 | F | F | F |
| 0.5947471985587592 | 0.4240714718365001 | 0.4843742266989828 | T | T | T |
| 0.4333333348234518 | 0.6333333340783938 | 0.2603887055110903 | F | F | F |
| 0.266666681567804  | 0.7166666674117224 | 0.3698056472444549 | F | F | F |
| 0.1018197192390481 | 0.5532954252707049 | 0.4740828103525331 | T | T | T |
| 0.1833333348234518 | 0.6333333340783938 | 0.2603887055110903 | F | F | F |
| 0.016666681567804  | 0.7166666674117224 | 0.3698056472444549 | F | F | F |
| 0.3501455961311452 | 0.5502811413873371 | 0.4749144547393553 | T | T | T |
| 0.1833333348234518 | 0.5083333340783938 | 0.2603887055110903 | F | F | F |
| 0.016666681567804  | 0.5916666674117224 | 0.3698056472444549 | F | F | F |
| 0.3521738026553670 | 0.6762823045484982 | 0.4821532208768682 | T | T | T |
| 0.4333333348234518 | 0.5083333340783938 | 0.2603887055110903 | F | F | F |
| 0.266666681567804  | 0.5916666674117224 | 0.3698056472444549 | F | F | F |
| 0.1049989763920116 | 0.6787819248743302 | 0.4766673023763781 | T | T | T |
| 0.9333333348234518 | 0.6333333340783938 | 0.2603887055110903 | F | F | F |
| 0.766666681567804  | 0.7166666674117224 | 0.3698056472444549 | F | F | F |
| 0.6049641911520421 | 0.5538531304369889 | 0.4741086857505120 | T | T | T |
| 0.6833333348234518 | 0.6333333340783938 | 0.2603887055110903 | F | F | F |
| 0.516666681567804  | 0.7166666674117224 | 0.3698056472444549 | F | F | F |
| 0.8554225197358160 | 0.5557195903139714 | 0.4769803930140268 | T | T | T |
| 0.6833333348234518 | 0.5083333340783938 | 0.2603887055110903 | F | F | F |
| 0.516666681567804  | 0.5916666674117224 | 0.3698056472444549 | F | F | F |
| 0.8523801206450837 | 0.6788998716540627 | 0.4765220986406800 | T | T | T |
| 0.9333333348234518 | 0.5083333340783938 | 0.2603887055110903 | F | F | F |
| 0.766666681567804  | 0.5916666674117224 | 0.3698056472444549 | F | F | F |
| 0.5999158545236507 | 0.6765334309086246 | 0.4815506051309243 | T | T | T |
| 0.4333333348234518 | 0.8833333340783938 | 0.2603887055110903 | F | F | F |
| 0.266666681567804  | 0.9666666674117224 | 0.3698056472444549 | F | F | F |

|                    |                    |                    |   |   |   |
|--------------------|--------------------|--------------------|---|---|---|
| 0.1013184524175013 | 0.8015633321950143 | 0.4772950314966375 | T | T | T |
| 0.1833333348234518 | 0.8833333340783938 | 0.2603887055110903 | F | F | F |
| 0.0166666681567804 | 0.9666666674117224 | 0.3698056472444549 | F | F | F |
| 0.3510246202377396 | 0.8008962205920637 | 0.4778275951496988 | T | T | T |
| 0.1833333348234518 | 0.7583333340783938 | 0.2603887055110903 | F | F | F |
| 0.0166666681567804 | 0.8416666674117224 | 0.3698056472444549 | F | F | F |
| 0.3504422825815657 | 0.9252757157727498 | 0.4774930302251647 | T | T | T |
| 0.4333333348234518 | 0.7583333340783938 | 0.2603887055110903 | F | F | F |
| 0.2666666681567804 | 0.8416666674117224 | 0.3698056472444549 | F | F | F |
| 0.1000542747307652 | 0.9254114059860731 | 0.4773774779678234 | T | T | T |
| 0.9333333348234518 | 0.8833333340783938 | 0.2603887055110903 | F | F | F |
| 0.7666666681567804 | 0.9666666674117224 | 0.3698056472444549 | F | F | F |
| 0.5999524687037450 | 0.8004278225624247 | 0.4784546823660102 | T | T | T |
| 0.6833333348234518 | 0.8833333340783938 | 0.2603887055110903 | F | F | F |
| 0.5166666681567804 | 0.9666666674117224 | 0.3698056472444549 | F | F | F |
| 0.8505669993849476 | 0.8011285258882442 | 0.4777872393685043 | T | T | T |
| 0.6833333348234518 | 0.7583333340783938 | 0.2603887055110903 | F | F | F |
| 0.5166666681567804 | 0.8416666674117224 | 0.3698056472444549 | F | F | F |
| 0.8494844164175065 | 0.9250632936171241 | 0.4775265848351823 | T | T | T |
| 0.9333333348234518 | 0.7583333340783938 | 0.2603887055110903 | F | F | F |
| 0.7666666681567804 | 0.8416666674117224 | 0.3698056472444549 | F | F | F |
| 0.5997844886346038 | 0.9249937208763520 | 0.4776319399096772 | T | T | T |
| 0.1156584180501006 | 0.4849314772030631 | 0.5971680701843233 | T | T | T |
| 0.4584336801712730 | 0.4848106782517287 | 0.5977029861967587 | T | T | T |
| 0.7826547621429110 | 0.4798967290863742 | 0.6056347111723738 | T | T | T |
| 0.0867424072322153 | 0.6168535462611670 | 0.5913748530986209 | T | T | T |
| 0.4231031659190390 | 0.6210077176606914 | 0.5917607464040112 | T | T | T |
| 0.7514946550413312 | 0.6160924310789360 | 0.5913896824999431 | T | T | T |

|                    |                    |                    |   |   |   |
|--------------------|--------------------|--------------------|---|---|---|
| 0.2562604012170538 | 0.4537780379231090 | 0.5639107411675320 | T | T | T |
| 0.5756446621831188 | 0.4385264164164702 | 0.5865049285953605 | T | T | T |
| 0.9055413724017912 | 0.4379380921834166 | 0.5861750055211800 | T | T | T |
| 0.2246734826793509 | 0.5880322827995622 | 0.6264251296287463 | T | T | T |
| 0.5561781700252868 | 0.5882147775291240 | 0.6262458819482942 | T | T | T |
| 0.8894539796871537 | 0.5866306080127071 | 0.6244526142090518 | T | T | T |

**Table S13.** Optimized fractional coordinates of the defective  $W_2^1(111)$  surface.

Cu Zn O

|                     |                     |                      |
|---------------------|---------------------|----------------------|
| 1.0000000000000000  |                     |                      |
| 7.2781844327311198  | -7.2781844327311198 | 0.0000000000000021   |
| 0.0000000000000000  | 14.5563688654622005 | -14.5563688654622005 |
| 11.0863155154214006 | 11.0863155154214006 | 11.0863155154214006  |

|    |    |   |
|----|----|---|
| Cu | Zn | O |
| 96 | 6  | 5 |

Selective dynamics

Direct

|                    |                    |                    |   |   |   |
|--------------------|--------------------|--------------------|---|---|---|
| 0.4333333348234518 | 0.1333333340783938 | 0.2603887055110903 | F | F | F |
| 0.266666681567804  | 0.216666674117224  | 0.3698056472444549 | F | F | F |
| 0.1008384542153400 | 0.0501406563694258 | 0.4776352326717333 | T | T | T |
| 0.1833333348234518 | 0.1333333340783938 | 0.2603887055110903 | F | F | F |
| 0.016666681567804  | 0.216666674117224  | 0.3698056472444549 | F | F | F |
| 0.3507534002814888 | 0.0501464909326303 | 0.4774858132633542 | T | T | T |
| 0.1833333348234518 | 0.0083333340783938 | 0.2603887055110903 | F | F | F |
| 0.016666681567804  | 0.091666674117224  | 0.3698056472444549 | F | F | F |
| 0.3505640007509183 | 0.1742560444845279 | 0.4774846203113748 | T | T | T |
| 0.4333333348234518 | 0.0083333340783938 | 0.2603887055110903 | F | F | F |
| 0.266666681567804  | 0.091666674117224  | 0.3698056472444549 | F | F | F |
| 0.0998897797412203 | 0.1739756879994380 | 0.4778420387310777 | T | T | T |
| 0.9333333348234518 | 0.1333333340783938 | 0.2603887055110903 | F | F | F |
| 0.766666681567804  | 0.216666674117224  | 0.3698056472444549 | F | F | F |
| 0.6006772586624540 | 0.0501246610370890 | 0.4774143343503914 | T | T | T |
| 0.6833333348234518 | 0.1333333340783938 | 0.2603887055110903 | F | F | F |
| 0.516666681567804  | 0.216666674117224  | 0.3698056472444549 | F | F | F |
| 0.8509816730287664 | 0.0503368083663383 | 0.4776607314650153 | T | T | T |

|                    |                    |                    |   |   |   |
|--------------------|--------------------|--------------------|---|---|---|
| 0.6833333348234518 | 0.0083333340783938 | 0.2603887055110903 | F | F | F |
| 0.5166666681567804 | 0.0916666674117224 | 0.3698056472444549 | F | F | F |
| 0.8497638015176785 | 0.1743472576150998 | 0.4775715138293528 | T | T | T |
| 0.9333333348234518 | 0.0083333340783938 | 0.2603887055110903 | F | F | F |
| 0.7666666681567804 | 0.0916666674117224 | 0.3698056472444549 | F | F | F |
| 0.6004273583728974 | 0.1745544067429821 | 0.4772198966468374 | T | T | T |
| 0.4333333348234518 | 0.3833333340783938 | 0.2603887055110903 | F | F | F |
| 0.2666666681567804 | 0.4666666674117224 | 0.3698056472444549 | F | F | F |
| 0.0993903900182133 | 0.2972075235327829 | 0.4766737713307025 | T | T | T |
| 0.1833333348234518 | 0.3833333340783938 | 0.2603887055110903 | F | F | F |
| 0.0166666681567804 | 0.4666666674117224 | 0.3698056472444549 | F | F | F |
| 0.3497155975623576 | 0.2978727361837584 | 0.4774582074270628 | T | T | T |
| 0.1833333348234518 | 0.2583333340783938 | 0.2603887055110903 | F | F | F |
| 0.0166666681567804 | 0.3416666674117224 | 0.3698056472444549 | F | F | F |
| 0.3543603638561013 | 0.4217935276942281 | 0.4746831704267255 | T | T | T |
| 0.4333333348234518 | 0.2583333340783938 | 0.2603887055110903 | F | F | F |
| 0.2666666681567804 | 0.3416666674117224 | 0.3698056472444549 | F | F | F |
| 0.1069075500723731 | 0.4238068587837820 | 0.4828345641447216 | T | T | T |
| 0.9333333348234518 | 0.3833333340783938 | 0.2603887055110903 | F | F | F |
| 0.7666666681567804 | 0.4666666674117224 | 0.3698056472444549 | F | F | F |
| 0.5984792978852064 | 0.2985920241368007 | 0.4767443862269460 | T | T | T |
| 0.6833333348234518 | 0.3833333340783938 | 0.2603887055110903 | F | F | F |
| 0.5166666681567804 | 0.4666666674117224 | 0.3698056472444549 | F | F | F |
| 0.8494386030669038 | 0.2983507265997234 | 0.4756281648514193 | T | T | T |
| 0.6833333348234518 | 0.2583333340783938 | 0.2603887055110903 | F | F | F |
| 0.5166666681567804 | 0.3416666674117224 | 0.3698056472444549 | F | F | F |
| 0.8501144427121594 | 0.4245480760018295 | 0.4848110124270760 | T | T | T |
| 0.9333333348234518 | 0.2583333340783938 | 0.2603887055110903 | F | F | F |

|                    |                    |                    |   |   |   |
|--------------------|--------------------|--------------------|---|---|---|
| 0.766666681567804  | 0.3416666674117224 | 0.3698056472444549 | F | F | F |
| 0.5983666695892942 | 0.4245077897015625 | 0.4784279700103019 | T | T | T |
| 0.4333333348234518 | 0.6333333340783938 | 0.2603887055110903 | F | F | F |
| 0.266666681567804  | 0.7166666674117224 | 0.3698056472444549 | F | F | F |
| 0.1059398122303238 | 0.5560270064734785 | 0.4766683592237623 | T | T | T |
| 0.1833333348234518 | 0.6333333340783938 | 0.2603887055110903 | F | F | F |
| 0.016666681567804  | 0.7166666674117224 | 0.3698056472444549 | F | F | F |
| 0.3527272292768475 | 0.5530645376992891 | 0.4731979621599203 | T | T | T |
| 0.1833333348234518 | 0.5083333340783938 | 0.2603887055110903 | F | F | F |
| 0.016666681567804  | 0.5916666674117224 | 0.3698056472444549 | F | F | F |
| 0.3559050309148976 | 0.6785135302382284 | 0.4781125263650404 | T | T | T |
| 0.4333333348234518 | 0.5083333340783938 | 0.2603887055110903 | F | F | F |
| 0.266666681567804  | 0.5916666674117224 | 0.3698056472444549 | F | F | F |
| 0.1038711535341991 | 0.6793445689696987 | 0.4761198314394446 | T | T | T |
| 0.9333333348234518 | 0.6333333340783938 | 0.2603887055110903 | F | F | F |
| 0.766666681567804  | 0.7166666674117224 | 0.3698056472444549 | F | F | F |
| 0.5975131116628335 | 0.5465664070541363 | 0.4792398422713845 | T | T | T |
| 0.6833333348234518 | 0.6333333340783938 | 0.2603887055110903 | F | F | F |
| 0.516666681567804  | 0.7166666674117224 | 0.3698056472444549 | F | F | F |
| 0.8553905061257231 | 0.5547732884220057 | 0.4740659874645656 | T | T | T |
| 0.6833333348234518 | 0.5083333340783938 | 0.2603887055110903 | F | F | F |
| 0.516666681567804  | 0.5916666674117224 | 0.3698056472444549 | F | F | F |
| 0.8496109822788970 | 0.6771302326387476 | 0.4795005101262599 | T | T | T |
| 0.9333333348234518 | 0.5083333340783938 | 0.2603887055110903 | F | F | F |
| 0.766666681567804  | 0.5916666674117224 | 0.3698056472444549 | F | F | F |
| 0.6021905135127533 | 0.6755877177181880 | 0.4838564639837672 | T | T | T |
| 0.4333333348234518 | 0.8833333340783938 | 0.2603887055110903 | F | F | F |
| 0.266666681567804  | 0.9666666674117224 | 0.3698056472444549 | F | F | F |



|                    |                    |                    |   |   |   |
|--------------------|--------------------|--------------------|---|---|---|
| 0.1018326895953121 | 0.8016302217413891 | 0.4776238887151467 | T | T | T |
| 0.1833333348234518 | 0.8833333340783938 | 0.2603887055110903 | F | F | F |
| 0.0166666681567804 | 0.9666666674117224 | 0.3698056472444549 | F | F | F |
| 0.3522351218242610 | 0.8018685876278380 | 0.4775031181852127 | T | T | T |
| 0.1833333348234518 | 0.7583333340783938 | 0.2603887055110903 | F | F | F |
| 0.0166666681567804 | 0.8416666674117224 | 0.3698056472444549 | F | F | F |
| 0.3518305496054059 | 0.9259813698548590 | 0.4773936671437046 | T | T | T |
| 0.4333333348234518 | 0.7583333340783938 | 0.2603887055110903 | F | F | F |
| 0.2666666681567804 | 0.8416666674117224 | 0.3698056472444549 | F | F | F |
| 0.1011449520707193 | 0.9257951606756654 | 0.4775114811521313 | T | T | T |
| 0.9333333348234518 | 0.8833333340783938 | 0.2603887055110903 | F | F | F |
| 0.7666666681567804 | 0.9666666674117224 | 0.3698056472444549 | F | F | F |
| 0.6018140782403850 | 0.8008977361911667 | 0.4781370127739048 | T | T | T |
| 0.6833333348234518 | 0.8833333340783938 | 0.2603887055110903 | F | F | F |
| 0.5166666681567804 | 0.9666666674117224 | 0.3698056472444549 | F | F | F |
| 0.8511258517959607 | 0.8010253995883577 | 0.4783166856943867 | T | T | T |
| 0.6833333348234518 | 0.7583333340783938 | 0.2603887055110903 | F | F | F |
| 0.5166666681567804 | 0.8416666674117224 | 0.3698056472444549 | F | F | F |
| 0.8510084873998170 | 0.9257489581942158 | 0.4776602383338323 | T | T | T |
| 0.9333333348234518 | 0.7583333340783938 | 0.2603887055110903 | F | F | F |
| 0.7666666681567804 | 0.8416666674117224 | 0.3698056472444549 | F | F | F |
| 0.6018241624780003 | 0.9258767456802461 | 0.4775576077613384 | T | T | T |
| 0.0636673594779583 | 0.4831288421596287 | 0.6086815154031813 | T | T | T |
| 0.3891669620625101 | 0.4921732386256907 | 0.5837843715255371 | T | T | T |
| 0.7476852848425369 | 0.4861973942981987 | 0.5873291062877571 | T | T | T |
| 0.0328114923078551 | 0.6170943631414190 | 0.5921600598617167 | T | T | T |
| 0.3701879576562114 | 0.6222249859580464 | 0.5921502466456102 | T | T | T |
| 0.6970723530509420 | 0.6175843612013412 | 0.5933374838315707 | T | T | T |

|                    |                    |                    |   |   |   |
|--------------------|--------------------|--------------------|---|---|---|
| 0.1765513070105268 | 0.4379099447218341 | 0.5823734597912414 | T | T | T |
| 0.8575174153824271 | 0.4358429115124215 | 0.5888368525672348 | T | T | T |
| 0.1717655135919192 | 0.5893154856348157 | 0.6272729665451474 | T | T | T |
| 0.5008017859123965 | 0.5876339042488320 | 0.6290886296059959 | T | T | T |
| 0.8325532576610037 | 0.5853809701106816 | 0.6256217133156459 | T | T | T |

**Table S14.** Optimized fractional coordinates of the perfect  $W_3^1(100)$  surface.

Cu Zn O

|                     |                     |                     |
|---------------------|---------------------|---------------------|
| 1.0000000000000000  |                     |                     |
| 0.0000000000000000  | 10.9172766490966993 | 0.0000000000000000  |
| 0.0000000000000000  | 0.0000000000000000  | 18.1954610818278013 |
| 18.6390922163656008 | 0.0000000000000000  | 0.0000000000000000  |

|    |    |   |
|----|----|---|
| Cu | Zn | O |
| 90 | 9  | 9 |

Selective dynamics

Direct

|                    |                    |                    |   |   |   |
|--------------------|--------------------|--------------------|---|---|---|
| 0.1000000139077528 | 0.0600000023841858 | 0.3658732962432083 | F | F | F |
| 0.2666666805744171 | 0.0600000023841858 | 0.2682534075135834 | F | F | F |
| 0.2670493954030414 | 0.0599192562197926 | 0.4604835697623501 | T | T | T |
| 0.1000000139077528 | 0.1600000023841872 | 0.2682534075135834 | F | F | F |
| 0.1015385084844880 | 0.1590464044928538 | 0.4606393666843565 | T | T | T |
| 0.2666666805744171 | 0.1600000023841872 | 0.3658732962432083 | F | F | F |
| 0.4333333472410814 | 0.0600000023841858 | 0.3658732962432083 | F | F | F |
| 0.6000000139077528 | 0.0600000023841858 | 0.2682534075135834 | F | F | F |
| 0.6003701303905808 | 0.0598809380498111 | 0.4604737918701636 | T | T | T |
| 0.4333333472410814 | 0.1600000023841872 | 0.2682534075135834 | F | F | F |
| 0.4348267872795730 | 0.1590839216077487 | 0.4606213600354233 | T | T | T |
| 0.6000000139077528 | 0.1600000023841872 | 0.3658732962432083 | F | F | F |
| 0.7666666805744171 | 0.0600000023841858 | 0.3658732962432083 | F | F | F |
| 0.9333333472410814 | 0.0600000023841858 | 0.2682534075135834 | F | F | F |
| 0.9338266337735454 | 0.0599177919367081 | 0.4604898659739471 | T | T | T |
| 0.7666666805744171 | 0.1600000023841872 | 0.2682534075135834 | F | F | F |
| 0.7681778666765935 | 0.1589868323121713 | 0.4606167190809565 | T | T | T |
| 0.9333333472410814 | 0.1600000023841872 | 0.3658732962432083 | F | F | F |

|                    |                    |                    |   |   |   |
|--------------------|--------------------|--------------------|---|---|---|
| 0.1000000139077528 | 0.2600000023841886 | 0.3658732962432083 | F | F | F |
| 0.2666666805744171 | 0.2600000023841886 | 0.2682534075135834 | F | F | F |
| 0.2706365245212498 | 0.2563459138437756 | 0.4603041835327649 | T | T | T |
| 0.1000000139077528 | 0.3600000023841829 | 0.2682534075135834 | F | F | F |
| 0.1089861843779997 | 0.3547842567313740 | 0.4652516759000966 | T | T | T |
| 0.2666666805744171 | 0.3600000023841829 | 0.3658732962432083 | F | F | F |
| 0.4333333472410814 | 0.2600000023841886 | 0.3658732962432083 | F | F | F |
| 0.6000000139077528 | 0.2600000023841886 | 0.2682534075135834 | F | F | F |
| 0.6040762711157452 | 0.2564002739158818 | 0.4602598625000042 | T | T | T |
| 0.4333333472410814 | 0.3600000023841829 | 0.2682534075135834 | F | F | F |
| 0.4421004067514794 | 0.3547728281261694 | 0.4651858216466406 | T | T | T |
| 0.6000000139077528 | 0.3600000023841829 | 0.3658732962432083 | F | F | F |
| 0.7666666805744171 | 0.2600000023841886 | 0.3658732962432083 | F | F | F |
| 0.9333333472410814 | 0.2600000023841886 | 0.2682534075135834 | F | F | F |
| 0.9373940388904569 | 0.2563741181925246 | 0.4602789159447762 | T | T | T |
| 0.7666666805744171 | 0.3600000023841829 | 0.2682534075135834 | F | F | F |
| 0.7755582410892443 | 0.3548585433522521 | 0.4651455598528544 | T | T | T |
| 0.9333333472410814 | 0.3600000023841829 | 0.3658732962432083 | F | F | F |
| 0.1000000139077528 | 0.4600000023841844 | 0.3658732962432083 | F | F | F |
| 0.2666666805744171 | 0.4600000023841844 | 0.2682534075135834 | F | F | F |
| 0.2631667602674778 | 0.4646626966370930 | 0.4613194998516874 | T | T | T |
| 0.1000000139077528 | 0.5600000023841858 | 0.2682534075135834 | F | F | F |
| 0.0947145806354245 | 0.5635850032840559 | 0.4607913595703040 | T | T | T |
| 0.2666666805744171 | 0.5600000023841858 | 0.3658732962432083 | F | F | F |
| 0.4333333472410814 | 0.4600000023841844 | 0.3658732962432083 | F | F | F |
| 0.6000000139077528 | 0.4600000023841844 | 0.2682534075135834 | F | F | F |
| 0.5964458146351507 | 0.4646733282985282 | 0.4613245356076576 | T | T | T |
| 0.4333333472410814 | 0.5600000023841858 | 0.2682534075135834 | F | F | F |

|                    |                    |                    |   |   |   |
|--------------------|--------------------|--------------------|---|---|---|
| 0.4280296463099890 | 0.5636383257089242 | 0.4607908086838730 | T | T | T |
| 0.6000000139077528 | 0.5600000023841858 | 0.3658732962432083 | F | F | F |
| 0.7666666805744171 | 0.4600000023841844 | 0.3658732962432083 | F | F | F |
| 0.9333333472410814 | 0.4600000023841844 | 0.2682534075135834 | F | F | F |
| 0.9298299514042632 | 0.4646476918644183 | 0.4613929177536120 | T | T | T |
| 0.7666666805744171 | 0.5600000023841858 | 0.2682534075135834 | F | F | F |
| 0.7613645951290853 | 0.5635716879990067 | 0.4607502190911160 | T | T | T |
| 0.9333333472410814 | 0.5600000023841858 | 0.3658732962432083 | F | F | F |
| 0.1000000139077528 | 0.6600000023841872 | 0.3658732962432083 | F | F | F |
| 0.2666666805744171 | 0.6600000023841872 | 0.2682534075135834 | F | F | F |
| 0.2606188557476388 | 0.6615313425653928 | 0.4647830200451866 | T | T | T |
| 0.1000000139077528 | 0.7600000023841886 | 0.2682534075135834 | F | F | F |
| 0.0959818246627256 | 0.7589821947283868 | 0.4624165577332717 | T | T | T |
| 0.2666666805744171 | 0.7600000023841886 | 0.3658732962432083 | F | F | F |
| 0.4333333472410814 | 0.6600000023841872 | 0.3658732962432083 | F | F | F |
| 0.6000000139077528 | 0.6600000023841872 | 0.2682534075135834 | F | F | F |
| 0.5940162302202979 | 0.6615654567768771 | 0.4648740261177314 | T | T | T |
| 0.4333333472410814 | 0.7600000023841886 | 0.2682534075135834 | F | F | F |
| 0.4292486777283566 | 0.7589338434675811 | 0.4623974387490736 | T | T | T |
| 0.6000000139077528 | 0.7600000023841886 | 0.3658732962432083 | F | F | F |
| 0.7666666805744171 | 0.6600000023841872 | 0.3658732962432083 | F | F | F |
| 0.9333333472410814 | 0.6600000023841872 | 0.2682534075135834 | F | F | F |
| 0.9273407790295025 | 0.6615578997817685 | 0.4647817105347851 | T | T | T |
| 0.7666666805744171 | 0.7600000023841886 | 0.2682534075135834 | F | F | F |
| 0.7625493609547598 | 0.7589651012838194 | 0.4625119805484214 | T | T | T |
| 0.9333333472410814 | 0.7600000023841886 | 0.3658732962432083 | F | F | F |
| 0.1000000139077528 | 0.8600000023841829 | 0.3658732962432083 | F | F | F |
| 0.2666666805744171 | 0.8600000023841829 | 0.2682534075135834 | F | F | F |

|                    |                    |                    |   |   |   |
|--------------------|--------------------|--------------------|---|---|---|
| 0.2652558363584275 | 0.8587573335882448 | 0.4606035604845749 | T | T | T |
| 0.1000000139077528 | 0.9600000023841844 | 0.2682534075135834 | F | F | F |
| 0.0997623934695425 | 0.9597671304573087 | 0.4603907074681040 | T | T | T |
| 0.266666805744171  | 0.9600000023841844 | 0.3658732962432083 | F | F | F |
| 0.4333333472410814 | 0.8600000023841829 | 0.3658732962432083 | F | F | F |
| 0.6000000139077528 | 0.8600000023841829 | 0.2682534075135834 | F | F | F |
| 0.5984759218208912 | 0.8587616176035116 | 0.4605932298027583 | T | T | T |
| 0.4333333472410814 | 0.9600000023841844 | 0.2682534075135834 | F | F | F |
| 0.4330585645019503 | 0.9598313793824119 | 0.4603822510372430 | T | T | T |
| 0.6000000139077528 | 0.9600000023841844 | 0.3658732962432083 | F | F | F |
| 0.766666805744171  | 0.8600000023841829 | 0.3658732962432083 | F | F | F |
| 0.9333333472410814 | 0.8600000023841829 | 0.2682534075135834 | F | F | F |
| 0.9318426434373612 | 0.8586983826495446 | 0.4606213670558384 | T | T | T |
| 0.766666805744171  | 0.9600000023841844 | 0.2682534075135834 | F | F | F |
| 0.7665441034304118 | 0.9598219223144370 | 0.4603601945302569 | T | T | T |
| 0.9333333472410814 | 0.9600000023841844 | 0.3658732962432083 | F | F | F |
| 0.2201412300572571 | 0.5517762675909558 | 0.6418858793880116 | T | T | T |
| 0.3788836037938174 | 0.4350922975812646 | 0.5805454210800918 | T | T | T |
| 0.4000860552473798 | 0.6669470014216191 | 0.5719428513226271 | T | T | T |
| 0.5533549533655480 | 0.5515502414285427 | 0.6421968045336663 | T | T | T |
| 0.7123996354151855 | 0.4349902862861072 | 0.5804526189016798 | T | T | T |
| 0.7335526957921989 | 0.6668987695185175 | 0.5721580874593495 | T | T | T |
| 0.8868078269828934 | 0.5515845629336713 | 0.6420449124126006 | T | T | T |
| 0.0456287951868644 | 0.4348738148811072 | 0.5806654230723587 | T | T | T |
| 0.0669178159767530 | 0.6666679298819398 | 0.5719675848738813 | T | T | T |
| 0.2096765890133595 | 0.4059160265679010 | 0.5498034005988158 | T | T | T |
| 0.2313564065819640 | 0.6509744387020391 | 0.6079940240014055 | T | T | T |
| 0.3864981587900023 | 0.5144983575441346 | 0.6457272565776750 | T | T | T |

|                    |                    |                    |   |   |   |
|--------------------|--------------------|--------------------|---|---|---|
| 0.5428747173947039 | 0.4059654102939216 | 0.5496201273050551 | T | T | T |
| 0.5646151793428469 | 0.6505528332485732 | 0.6076437637956821 | T | T | T |
| 0.7198903963510958 | 0.5143814678107723 | 0.6457018484810165 | T | T | T |
| 0.8763659136602754 | 0.4056519323852426 | 0.5497371532252834 | T | T | T |
| 0.8979576086981861 | 0.6507546543032979 | 0.6079723497193067 | T | T | T |
| 0.0532844968034310 | 0.5143387177414807 | 0.6457383775638688 | T | T | T |

**Table S15.** Optimized fractional coordinates of the defective  $W_3^1(100)$  surface.

Cu Zn O

|                     |                     |                     |
|---------------------|---------------------|---------------------|
| 1.0000000000000000  |                     |                     |
| 10.9172766490966993 | 0.0000000000000000  | 0.0000000000000000  |
| 0.0000000000000000  | 18.1954610818278013 | 0.0000000000000000  |
| 0.0000000000000000  | 0.0000000000000000  | 18.6390922163656008 |

|    |    |   |
|----|----|---|
| Cu | Zn | O |
| 90 | 9  | 8 |

Selective dynamics

Direct

|                    |                    |                    |   |   |   |
|--------------------|--------------------|--------------------|---|---|---|
| 0.1000000139077528 | 0.0600000023841858 | 0.3658732962432083 | F | F | F |
| 0.2666666805744171 | 0.0600000023841858 | 0.2682534075135834 | F | F | F |
| 0.2662298113939775 | 0.0601422329055013 | 0.4603779189032221 | T | T | T |
| 0.1000000139077528 | 0.1600000023841872 | 0.2682534075135834 | F | F | F |
| 0.0995383760856584 | 0.1598258577196800 | 0.4603407960557110 | T | T | T |
| 0.2666666805744171 | 0.1600000023841872 | 0.3658732962432083 | F | F | F |
| 0.4333333472410814 | 0.0600000023841858 | 0.3658732962432083 | F | F | F |
| 0.6000000139077528 | 0.0600000023841858 | 0.2682534075135834 | F | F | F |
| 0.6005238714733141 | 0.0597038258058223 | 0.4603056882358391 | T | T | T |
| 0.4333333472410814 | 0.1600000023841872 | 0.2682534075135834 | F | F | F |
| 0.4346619473703149 | 0.1584468639704770 | 0.4602728221219229 | T | T | T |
| 0.6000000139077528 | 0.1600000023841872 | 0.3658732962432083 | F | F | F |
| 0.7666666805744171 | 0.0600000023841858 | 0.3658732962432083 | F | F | F |
| 0.9333333472410814 | 0.0600000023841858 | 0.2682534075135834 | F | F | F |
| 0.9335867271525047 | 0.0599337488478356 | 0.4603748479076756 | T | T | T |
| 0.7666666805744171 | 0.1600000023841872 | 0.2682534075135834 | F | F | F |
| 0.7671378464183775 | 0.1594877031872704 | 0.4601608721671290 | T | T | T |
| 0.9333333472410814 | 0.1600000023841872 | 0.3658732962432083 | F | F | F |



|                    |                    |                    |   |   |   |
|--------------------|--------------------|--------------------|---|---|---|
| 0.1000000139077528 | 0.2600000023841886 | 0.3658732962432083 | F | F | F |
| 0.2666666805744171 | 0.2600000023841886 | 0.2682534075135834 | F | F | F |
| 0.2698749742743118 | 0.2559323060852904 | 0.4602579274635487 | T | T | T |
| 0.1000000139077528 | 0.3600000023841829 | 0.2682534075135834 | F | F | F |
| 0.1103335839906729 | 0.3549144261651553 | 0.4666417510034737 | T | T | T |
| 0.2666666805744171 | 0.3600000023841829 | 0.3658732962432083 | F | F | F |
| 0.4333333472410814 | 0.2600000023841886 | 0.3658732962432083 | F | F | F |
| 0.6000000139077528 | 0.2600000023841886 | 0.2682534075135834 | F | F | F |
| 0.6002528806111145 | 0.2582294999141333 | 0.4605815684985605 | T | T | T |
| 0.4333333472410814 | 0.3600000023841829 | 0.2682534075135834 | F | F | F |
| 0.4366051654096291 | 0.3571765258700920 | 0.4606363415601055 | T | T | T |
| 0.6000000139077528 | 0.3600000023841829 | 0.3658732962432083 | F | F | F |
| 0.7666666805744171 | 0.2600000023841886 | 0.3658732962432083 | F | F | F |
| 0.9333333472410814 | 0.2600000023841886 | 0.2682534075135834 | F | F | F |
| 0.9339946696865475 | 0.2594609538136619 | 0.4593758242992189 | T | T | T |
| 0.7666666805744171 | 0.3600000023841829 | 0.2682534075135834 | F | F | F |
| 0.7627428632937548 | 0.3583612951359300 | 0.4619882733843403 | T | T | T |
| 0.9333333472410814 | 0.3600000023841829 | 0.3658732962432083 | F | F | F |
| 0.1000000139077528 | 0.4600000023841844 | 0.3658732962432083 | F | F | F |
| 0.2666666805744171 | 0.4600000023841844 | 0.2682534075135834 | F | F | F |
| 0.2606625211981035 | 0.4658782859739602 | 0.4596614709161754 | T | T | T |
| 0.1000000139077528 | 0.5600000023841858 | 0.2682534075135834 | F | F | F |
| 0.0976825032738052 | 0.5649333267284263 | 0.4601057620670904 | T | T | T |
| 0.2666666805744171 | 0.5600000023841858 | 0.3658732962432083 | F | F | F |
| 0.4333333472410814 | 0.4600000023841844 | 0.3658732962432083 | F | F | F |
| 0.6000000139077528 | 0.4600000023841844 | 0.2682534075135834 | F | F | F |
| 0.5934215261816138 | 0.4574047782139124 | 0.4703815873854276 | T | T | T |
| 0.4333333472410814 | 0.5600000023841858 | 0.2682534075135834 | F | F | F |

|                    |                    |                    |   |   |   |
|--------------------|--------------------|--------------------|---|---|---|
| 0.4323736880354040 | 0.5602480158715556 | 0.4611272826533544 | T | T | T |
| 0.6000000139077528 | 0.5600000023841858 | 0.3658732962432083 | F | F | F |
| 0.7666666805744171 | 0.4600000023841844 | 0.3658732962432083 | F | F | F |
| 0.9333333472410814 | 0.4600000023841844 | 0.2682534075135834 | F | F | F |
| 0.9367782484465481 | 0.4625743248015529 | 0.4608455724800810 | T | T | T |
| 0.7666666805744171 | 0.5600000023841858 | 0.2682534075135834 | F | F | F |
| 0.7614375030830051 | 0.5595530053413802 | 0.4606298526642356 | T | T | T |
| 0.9333333472410814 | 0.5600000023841858 | 0.3658732962432083 | F | F | F |
| 0.1000000139077528 | 0.6600000023841872 | 0.3658732962432083 | F | F | F |
| 0.2666666805744171 | 0.6600000023841872 | 0.2682534075135834 | F | F | F |
| 0.2651074964977347 | 0.6612274573597894 | 0.4643267187474512 | T | T | T |
| 0.1000000139077528 | 0.7600000023841886 | 0.2682534075135834 | F | F | F |
| 0.0986055173881583 | 0.7595048133067689 | 0.4612680584576215 | T | T | T |
| 0.2666666805744171 | 0.7600000023841886 | 0.3658732962432083 | F | F | F |
| 0.4333333472410814 | 0.6600000023841872 | 0.3658732962432083 | F | F | F |
| 0.6000000139077528 | 0.6600000023841872 | 0.2682534075135834 | F | F | F |
| 0.5971367867785913 | 0.6613703141905655 | 0.4661142314469539 | T | T | T |
| 0.4333333472410814 | 0.7600000023841886 | 0.2682534075135834 | F | F | F |
| 0.4317471547317766 | 0.7605787718720566 | 0.4606833812830421 | T | T | T |
| 0.6000000139077528 | 0.7600000023841886 | 0.3658732962432083 | F | F | F |
| 0.7666666805744171 | 0.6600000023841872 | 0.3658732962432083 | F | F | F |
| 0.9333333472410814 | 0.6600000023841872 | 0.2682534075135834 | F | F | F |
| 0.9291365315724947 | 0.6609193501014987 | 0.4653692624190567 | T | T | T |
| 0.7666666805744171 | 0.7600000023841886 | 0.2682534075135834 | F | F | F |
| 0.7654274789123342 | 0.7600258146413583 | 0.4610235211533441 | T | T | T |
| 0.9333333472410814 | 0.7600000023841886 | 0.3658732962432083 | F | F | F |
| 0.1000000139077528 | 0.8600000023841829 | 0.3658732962432083 | F | F | F |
| 0.2666666805744171 | 0.8600000023841829 | 0.2682534075135834 | F | F | F |

|                    |                    |                    |   |   |   |
|--------------------|--------------------|--------------------|---|---|---|
| 0.2656984880797213 | 0.8591890140555003 | 0.4606453284820330 | T | T | T |
| 0.1000000139077528 | 0.9600000023841844 | 0.2682534075135834 | F | F | F |
| 0.0998582006320977 | 0.9598530048464761 | 0.4602996653517281 | T | T | T |
| 0.266666805744171  | 0.9600000023841844 | 0.3658732962432083 | F | F | F |
| 0.4333333472410814 | 0.8600000023841829 | 0.3658732962432083 | F | F | F |
| 0.6000000139077528 | 0.8600000023841829 | 0.2682534075135834 | F | F | F |
| 0.5994822311752320 | 0.8593221301086593 | 0.4606014446190974 | T | T | T |
| 0.4333333472410814 | 0.9600000023841844 | 0.2682534075135834 | F | F | F |
| 0.4327024095475656 | 0.9599587939317257 | 0.4603042673590897 | T | T | T |
| 0.6000000139077528 | 0.9600000023841844 | 0.3658732962432083 | F | F | F |
| 0.766666805744171  | 0.8600000023841829 | 0.3658732962432083 | F | F | F |
| 0.9333333472410814 | 0.8600000023841829 | 0.2682534075135834 | F | F | F |
| 0.9331866102897352 | 0.8590740377172275 | 0.4603140583588523 | T | T | T |
| 0.766666805744171  | 0.9600000023841844 | 0.2682534075135834 | F | F | F |
| 0.7671124734797619 | 0.9598691724819252 | 0.4603045718863617 | T | T | T |
| 0.9333333472410814 | 0.9600000023841844 | 0.3658732962432083 | F | F | F |
| 0.2518502043840102 | 0.5564696090052894 | 0.6401241739297353 | T | T | T |
| 0.4022582582653570 | 0.4430403689616806 | 0.5616439125384607 | T | T | T |
| 0.4181899613015408 | 0.6728105762820346 | 0.5679162630091222 | T | T | T |
| 0.5811583975061615 | 0.5519436413561425 | 0.6288614153227179 | T | T | T |
| 0.7626607207221937 | 0.4546291860226530 | 0.5622752593587224 | T | T | T |
| 0.7587234231315462 | 0.6676899848965543 | 0.5687287386790012 | T | T | T |
| 0.9196930047413648 | 0.5589537286640546 | 0.6437242770107058 | T | T | T |
| 0.0781622177030472 | 0.4393875305043750 | 0.5909570225302544 | T | T | T |
| 0.0906458005935733 | 0.6711166647883688 | 0.5694188964884449 | T | T | T |
| 0.2246559823390229 | 0.4042923869700766 | 0.5479872723612972 | T | T | T |
| 0.2552840623761812 | 0.6559057598710870 | 0.6071348063554456 | T | T | T |
| 0.4152871570217077 | 0.5147303904230062 | 0.6352328525625353 | T | T | T |

|                    |                    |                    |   |   |   |
|--------------------|--------------------|--------------------|---|---|---|
| 0.5862971342779705 | 0.6531572284032984 | 0.5973570180704362 | T | T | T |
| 0.7517707513566382 | 0.5238680054355912 | 0.6386665839692640 | T | T | T |
| 0.9235497572332124 | 0.4107090445412757 | 0.5546375785807991 | T | T | T |
| 0.9235679517198995 | 0.6567851177454441 | 0.6060851520073174 | T | T | T |
| 0.0854157387516022 | 0.5228296309071391 | 0.6509424395759669 | T | T | T |

**Table S16.** Optimized fractional coordinates of the perfect  $W_2^1(100)$  surface.

Cu Zn O

|                     |                     |                     |
|---------------------|---------------------|---------------------|
| 1.0000000000000000  |                     |                     |
| 10.9172766490966993 | 0.0000000000000000  | 0.0000000000000000  |
| 0.0000000000000000  | 18.1954610818278013 | 0.0000000000000000  |
| 0.0000000000000000  | 0.0000000000000000  | 18.6390922163656008 |

Cu Zn O

90 6 6

Selective dynamics

Direct

|                    |                    |                    |   |   |   |
|--------------------|--------------------|--------------------|---|---|---|
| 0.1000000139077528 | 0.0600000023841858 | 0.3658732962432083 | F | F | F |
| 0.2666666805744171 | 0.0600000023841858 | 0.2682534075135834 | F | F | F |
| 0.2673751023138025 | 0.0597657131453708 | 0.4602486411119009 | T | T | T |
| 0.1000000139077528 | 0.1600000023841872 | 0.2682534075135834 | F | F | F |
| 0.1011206343325735 | 0.1592019793549700 | 0.4605354107847294 | T | T | T |
| 0.2666666805744171 | 0.1600000023841872 | 0.3658732962432083 | F | F | F |
| 0.4333333472410814 | 0.0600000023841858 | 0.3658732962432083 | F | F | F |
| 0.6000000139077528 | 0.0600000023841858 | 0.2682534075135834 | F | F | F |
| 0.6007203220782455 | 0.0597566022534258 | 0.4602495038727631 | T | T | T |
| 0.4333333472410814 | 0.1600000023841872 | 0.2682534075135834 | F | F | F |
| 0.4344770843596604 | 0.1591860620005087 | 0.4605341851317363 | T | T | T |
| 0.6000000139077528 | 0.1600000023841872 | 0.3658732962432083 | F | F | F |
| 0.7666666805744171 | 0.0600000023841858 | 0.3658732962432083 | F | F | F |
| 0.9333333472410814 | 0.0600000023841858 | 0.2682534075135834 | F | F | F |
| 0.9340748382189498 | 0.0597626717138165 | 0.4602499927705002 | T | T | T |
| 0.7666666805744171 | 0.1600000023841872 | 0.2682534075135834 | F | F | F |
| 0.7678110781498551 | 0.1591909535081034 | 0.4605321119238356 | T | T | T |
| 0.9333333472410814 | 0.1600000023841872 | 0.3658732962432083 | F | F | F |

|                    |                    |                    |   |   |   |
|--------------------|--------------------|--------------------|---|---|---|
| 0.1000000139077528 | 0.2600000023841886 | 0.3658732962432083 | F | F | F |
| 0.2666666805744171 | 0.2600000023841886 | 0.2682534075135834 | F | F | F |
| 0.2698252960346399 | 0.2568975906364502 | 0.4603381518352058 | T | T | T |
| 0.1000000139077528 | 0.3600000023841829 | 0.2682534075135834 | F | F | F |
| 0.1077578032912821 | 0.3555117860402771 | 0.4645421556798655 | T | T | T |
| 0.2666666805744171 | 0.3600000023841829 | 0.3658732962432083 | F | F | F |
| 0.4333333472410814 | 0.2600000023841886 | 0.3658732962432083 | F | F | F |
| 0.6000000139077528 | 0.2600000023841886 | 0.2682534075135834 | F | F | F |
| 0.6031743277839837 | 0.2568983552545134 | 0.4603482694087631 | T | T | T |
| 0.4333333472410814 | 0.3600000023841829 | 0.2682534075135834 | F | F | F |
| 0.4410650416860126 | 0.3555064549347587 | 0.4645220833860489 | T | T | T |
| 0.6000000139077528 | 0.3600000023841829 | 0.3658732962432083 | F | F | F |
| 0.7666666805744171 | 0.2600000023841886 | 0.3658732962432083 | F | F | F |
| 0.9333333472410814 | 0.2600000023841886 | 0.2682534075135834 | F | F | F |
| 0.9365041302071467 | 0.2569165838456587 | 0.4603430942573592 | T | T | T |
| 0.7666666805744171 | 0.3600000023841829 | 0.2682534075135834 | F | F | F |
| 0.7743256795415346 | 0.3555274353689423 | 0.4645147649549692 | T | T | T |
| 0.9333333472410814 | 0.3600000023841829 | 0.3658732962432083 | F | F | F |
| 0.1000000139077528 | 0.4600000023841844 | 0.3658732962432083 | F | F | F |
| 0.2666666805744171 | 0.4600000023841844 | 0.2682534075135834 | F | F | F |
| 0.2623903390856391 | 0.4627060236505234 | 0.4603356985870487 | T | T | T |
| 0.1000000139077528 | 0.5600000023841858 | 0.2682534075135834 | F | F | F |
| 0.0934106365060378 | 0.5650617424649449 | 0.4634931582025545 | T | T | T |
| 0.2666666805744171 | 0.5600000023841858 | 0.3658732962432083 | F | F | F |
| 0.4333333472410814 | 0.4600000023841844 | 0.3658732962432083 | F | F | F |
| 0.6000000139077528 | 0.4600000023841844 | 0.2682534075135834 | F | F | F |
| 0.5956579375672061 | 0.4626993163315047 | 0.4604165015430863 | T | T | T |
| 0.4333333472410814 | 0.5600000023841858 | 0.2682534075135834 | F | F | F |

|                    |                    |                    |   |   |   |
|--------------------|--------------------|--------------------|---|---|---|
| 0.4267991334598607 | 0.5650673573650952 | 0.4635100349010560 | T | T | T |
| 0.6000000139077528 | 0.5600000023841858 | 0.3658732962432083 | F | F | F |
| 0.7666666805744171 | 0.4600000023841844 | 0.3658732962432083 | F | F | F |
| 0.9333333472410814 | 0.4600000023841844 | 0.2682534075135834 | F | F | F |
| 0.9290617020086817 | 0.4627048280344501 | 0.4603302716573019 | T | T | T |
| 0.7666666805744171 | 0.5600000023841858 | 0.2682534075135834 | F | F | F |
| 0.7601598243155214 | 0.5649817894424941 | 0.4633747704966297 | T | T | T |
| 0.9333333472410814 | 0.5600000023841858 | 0.3658732962432083 | F | F | F |
| 0.1000000139077528 | 0.6600000023841872 | 0.3658732962432083 | F | F | F |
| 0.2666666805744171 | 0.6600000023841872 | 0.2682534075135834 | F | F | F |
| 0.2617975670159304 | 0.6613249322118873 | 0.4632964930918056 | T | T | T |
| 0.1000000139077528 | 0.7600000023841886 | 0.2682534075135834 | F | F | F |
| 0.0975706249270672 | 0.7593287202868495 | 0.4609319150547022 | T | T | T |
| 0.2666666805744171 | 0.7600000023841886 | 0.3658732962432083 | F | F | F |
| 0.4333333472410814 | 0.6600000023841872 | 0.3658732962432083 | F | F | F |
| 0.6000000139077528 | 0.6600000023841872 | 0.2682534075135834 | F | F | F |
| 0.5951754078387855 | 0.6612806059762190 | 0.4633322920243192 | T | T | T |
| 0.4333333472410814 | 0.7600000023841886 | 0.2682534075135834 | F | F | F |
| 0.4310092782558647 | 0.7593273573351399 | 0.4609228812051964 | T | T | T |
| 0.6000000139077528 | 0.7600000023841886 | 0.3658732962432083 | F | F | F |
| 0.7666666805744171 | 0.6600000023841872 | 0.3658732962432083 | F | F | F |
| 0.9333333472410814 | 0.6600000023841872 | 0.2682534075135834 | F | F | F |
| 0.9283908426407094 | 0.6612951447748923 | 0.4633123527932763 | T | T | T |
| 0.7666666805744171 | 0.7600000023841886 | 0.2682534075135834 | F | F | F |
| 0.7642637225129190 | 0.7593639797152293 | 0.4609352371200050 | T | T | T |
| 0.9333333472410814 | 0.7600000023841886 | 0.3658732962432083 | F | F | F |
| 0.1000000139077528 | 0.8600000023841829 | 0.3658732962432083 | F | F | F |
| 0.2666666805744171 | 0.8600000023841829 | 0.2682534075135834 | F | F | F |

|                    |                    |                    |   |   |   |
|--------------------|--------------------|--------------------|---|---|---|
| 0.2658323360422767 | 0.8597904468306127 | 0.4604330915611196 | T | T | T |
| 0.1000000139077528 | 0.9600000023841844 | 0.2682534075135834 | F | F | F |
| 0.1002091461347933 | 0.9599735375746499 | 0.4605323159724383 | T | T | T |
| 0.2666666805744171 | 0.9600000023841844 | 0.3658732962432083 | F | F | F |
| 0.4333333472410814 | 0.8600000023841829 | 0.3658732962432083 | F | F | F |
| 0.6000000139077528 | 0.8600000023841829 | 0.2682534075135834 | F | F | F |
| 0.5991728275979966 | 0.8598191114125593 | 0.4604333877810512 | T | T | T |
| 0.4333333472410814 | 0.9600000023841844 | 0.2682534075135834 | F | F | F |
| 0.4335042735387087 | 0.9599691750308436 | 0.4605310182430603 | T | T | T |
| 0.6000000139077528 | 0.9600000023841844 | 0.3658732962432083 | F | F | F |
| 0.7666666805744171 | 0.8600000023841829 | 0.3658732962432083 | F | F | F |
| 0.9333333472410814 | 0.8600000023841829 | 0.2682534075135834 | F | F | F |
| 0.9325180609982011 | 0.8598096036299400 | 0.4604368247099010 | T | T | T |
| 0.7666666805744171 | 0.9600000023841844 | 0.2682534075135834 | F | F | F |
| 0.7668851934305206 | 0.9599715748509009 | 0.4605346234128794 | T | T | T |
| 0.9333333472410814 | 0.9600000023841844 | 0.3658732962432083 | F | F | F |
| 0.2323715448327653 | 0.5726239302307097 | 0.5714786827209862 | T | T | T |
| 0.3878924146997292 | 0.4414794432062411 | 0.5780226277337764 | T | T | T |
| 0.5658247833194145 | 0.5726291664053641 | 0.5715580260654611 | T | T | T |
| 0.7211359746823857 | 0.4416732117372943 | 0.5780142182090325 | T | T | T |
| 0.8989004634002636 | 0.5727701693834434 | 0.5715554618098716 | T | T | T |
| 0.0544107703058234 | 0.4416014915981388 | 0.5779715463065309 | T | T | T |
| 0.2188369373613205 | 0.4092368404671983 | 0.5549076724335660 | T | T | T |
| 0.3970337938205944 | 0.5448750318630752 | 0.6004620294100291 | T | T | T |
| 0.5522770338435934 | 0.4089657924772961 | 0.5548655565871075 | T | T | T |
| 0.7304351487252387 | 0.5449249580440897 | 0.6008018723658943 | T | T | T |
| 0.8854965572231174 | 0.4091144204955756 | 0.5547755768818348 | T | T | T |
| 0.0636899933200796 | 0.5450808526176947 | 0.6002880076668436 | T | T | T |



**Table S17.** Optimized fractional coordinates of the perfect  $W_3^1(211)$  surface.

Cu Zn O

|                     |                      |                      |
|---------------------|----------------------|----------------------|
| 1.0000000000000000  |                      |                      |
| 10.9172766490966993 | -10.9172766490966993 | -10.9172766490966993 |
| 0.0000000000000000  | 7.2781844327311198   | -7.2781844327311198  |
| 17.7060870384642008 | 8.8530435192321200   | 8.8530435192321200   |

|     |    |   |
|-----|----|---|
| Cu  | Zn | O |
| 120 | 9  | 9 |

Selective dynamics

Direct

|                    |                    |                    |   |   |   |
|--------------------|--------------------|--------------------|---|---|---|
| 0.0615385612039887 | 0.0609289614114417 | 0.2646699365902521 | F | F | F |
| 0.2837607834262101 | 0.3109289614114417 | 0.3331791863275555 | F | F | F |
| 0.1729510965034736 | 0.0611805193006888 | 0.4021409258028111 | T | T | T |
| 0.0632355173663174 | 0.3113927790534363 | 0.4722315315183083 | T | T | T |
| 0.2794812981944932 | 0.0602465480663638 | 0.5308404046242785 | T | T | T |
| 0.2837607834262101 | 0.1859289614114417 | 0.2304153117216003 | F | F | F |
| 0.1726496723150959 | 0.4359289614114417 | 0.2989245614589038 | F | F | F |
| 0.0633195184308541 | 0.1864548207359429 | 0.3672607095947436 | T | T | T |
| 0.2859540188840260 | 0.4362424682498436 | 0.4348580547220538 | T | T | T |
| 0.1719439241746739 | 0.1874271557463341 | 0.5039678943906064 | T | T | T |
| 0.2837607834262101 | 0.4359289614114417 | 0.2304153117216003 | F | F | F |
| 0.1726496723150959 | 0.1859289614114417 | 0.2989245614589038 | F | F | F |
| 0.0632910454288724 | 0.4360520758863059 | 0.3672454686631725 | T | T | T |
| 0.2851997855518975 | 0.1876232967282966 | 0.4337202531773080 | T | T | T |
| 0.1736105455822868 | 0.4361377761158740 | 0.5043412766664576 | T | T | T |
| 0.0615385612039887 | 0.3109289614114417 | 0.2646699365902521 | F | F | F |
| 0.2837607834262101 | 0.0609289614114417 | 0.3331791863275555 | F | F | F |
| 0.1732929942976481 | 0.3113618231284752 | 0.4022220452396588 | T | T | T |

|                    |                    |                    |   |   |   |
|--------------------|--------------------|--------------------|---|---|---|
| 0.0625705486014838 | 0.0613632344866626 | 0.4720266586352555 | T | T | T |
| 0.2829707687599217 | 0.3098564734847448 | 0.5338264996832518 | T | T | T |
| 0.3948718945373244 | 0.0609289614114417 | 0.2646699365902521 | F | F | F |
| 0.6170941167595458 | 0.3109289614114417 | 0.3331791863275555 | F | F | F |
| 0.5057681182895761 | 0.0605705842611550 | 0.4017456588603887 | T | T | T |
| 0.3965605630502665 | 0.3127067800527698 | 0.4731859389999211 | T | T | T |
| 0.6156871089507013 | 0.0537407973466384 | 0.5306102308780798 | T | T | T |
| 0.6170941167595458 | 0.1859289614114417 | 0.2304153117216003 | F | F | F |
| 0.5059830056484316 | 0.4359289614114417 | 0.2989245614589038 | F | F | F |
| 0.3958565086846439 | 0.1870561974655964 | 0.3669816769380217 | T | T | T |
| 0.6201585221445185 | 0.4355505099077930 | 0.4377506989173380 | T | T | T |
| 0.5051634548460658 | 0.1844584819556775 | 0.5022784316457665 | T | T | T |
| 0.6170941167595458 | 0.4359289614114417 | 0.2304153117216003 | F | F | F |
| 0.5059830056484316 | 0.1859289614114417 | 0.2989245614589038 | F | F | F |
| 0.3956622075591433 | 0.4358821767852817 | 0.3673902416539766 | T | T | T |
| 0.6192656318514266 | 0.1870056832016098 | 0.4354619143123961 | T | T | T |
| 0.5091352236129654 | 0.4353179352958350 | 0.5019905984078705 | T | T | T |
| 0.3948718945373244 | 0.3109289614114417 | 0.2646699365902521 | F | F | F |
| 0.6170941167595458 | 0.0609289614114417 | 0.3331791863275555 | F | F | F |
| 0.5061771502390510 | 0.3109023928496635 | 0.4012058531531733 | T | T | T |
| 0.3936309240845457 | 0.0634572179504797 | 0.4702638305029255 | T | T | T |
| 0.6195131989213434 | 0.3009830515555384 | 0.5377709250174575 | T | T | T |
| 0.7282052278706530 | 0.0609289614114417 | 0.2646699365902521 | F | F | F |
| 0.9504274500928744 | 0.3109289614114417 | 0.3331791863275555 | F | F | F |
| 0.8410993354117656 | 0.0610719301990245 | 0.4010506591549176 | T | T | T |
| 0.7307709628246277 | 0.3106144332110671 | 0.4688695015850126 | T | T | T |
| 0.9476301149215562 | 0.0606372712316368 | 0.5321971896996439 | T | T | T |
| 0.9504274500928744 | 0.1859289614114417 | 0.2304153117216003 | F | F | F |

|                    |                    |                    |   |   |   |
|--------------------|--------------------|--------------------|---|---|---|
| 0.8393163389817673 | 0.4359289614114417 | 0.2989245614589038 | F | F | F |
| 0.7297774808415218 | 0.1869371095477982 | 0.3661215879247852 | T | T | T |
| 0.9543346948397995 | 0.4360810332199657 | 0.4344433278385062 | T | T | T |
| 0.8398462121567212 | 0.1855761294595545 | 0.5021939619018704 | T | T | T |
| 0.9504274500928744 | 0.4359289614114417 | 0.2304153117216003 | F | F | F |
| 0.8393163389817673 | 0.1859289614114417 | 0.2989245614589038 | F | F | F |
| 0.7293279323283279 | 0.4362692107624268 | 0.3666045852533234 | T | T | T |
| 0.9542098591323043 | 0.1864020419994152 | 0.4344118918513761 | T | T | T |
| 0.8401077780837878 | 0.4357897971666032 | 0.5023925799913613 | T | T | T |
| 0.7282052278706530 | 0.3109289614114417 | 0.2646699365902521 | F | F | F |
| 0.9504274500928744 | 0.0609289614114417 | 0.3331791863275555 | F | F | F |
| 0.8409433255438873 | 0.3110234709788998 | 0.4012806856347878 | T | T | T |
| 0.7303173539937325 | 0.0606084174657313 | 0.4678907531301805 | T | T | T |
| 0.9478635707774121 | 0.3107213200676943 | 0.5322833102451544 | T | T | T |
| 0.0615385612039887 | 0.5609289614114417 | 0.2646699365902521 | F | F | F |
| 0.2837607834262101 | 0.8109289614114417 | 0.3331791863275555 | F | F | F |
| 0.1732219239157672 | 0.5604325123208953 | 0.4021878504334397 | T | T | T |
| 0.0626414089828535 | 0.8103070672300007 | 0.4719964303305060 | T | T | T |
| 0.2834193262651092 | 0.5619998068704063 | 0.5341175639790452 | T | T | T |
| 0.2837607834262101 | 0.6859289614114417 | 0.2304153117216003 | F | F | F |
| 0.1726496723150959 | 0.9359289614114417 | 0.2989245614589038 | F | F | F |
| 0.0632666612119760 | 0.6857527714894247 | 0.3672591258345246 | T | T | T |
| 0.2847967214649447 | 0.9359436357779652 | 0.4328186822744042 | T | T | T |
| 0.1721552493608486 | 0.6846314289437618 | 0.5040594838837089 | T | T | T |
| 0.2837607834262101 | 0.9359289614114417 | 0.2304153117216003 | F | F | F |
| 0.1726496723150959 | 0.6859289614114417 | 0.2989245614589038 | F | F | F |
| 0.0633044742243612 | 0.9361423055664981 | 0.3671965763940660 | T | T | T |
| 0.2850868919480657 | 0.6844836645596973 | 0.4339291818413648 | T | T | T |

|                    |                    |                    |   |   |   |
|--------------------|--------------------|--------------------|---|---|---|
| 0.1705921695657701 | 0.9361433250612498 | 0.5035701602050506 | T | T | T |
| 0.0615385612039887 | 0.8109289614114417 | 0.2646699365902521 | F | F | F |
| 0.2837607834262101 | 0.5609289614114417 | 0.3331791863275555 | F | F | F |
| 0.1728924092576946 | 0.8105371356665628 | 0.4022217035109358 | T | T | T |
| 0.0632882698679052 | 0.5604260721462130 | 0.4722683980356671 | T | T | T |
| 0.2795465385986571 | 0.8119821724768010 | 0.5311087168652213 | T | T | T |
| 0.3948718945373244 | 0.5609289614114417 | 0.2646699365902521 | F | F | F |
| 0.6170941167595458 | 0.8109289614114417 | 0.3331791863275555 | F | F | F |
| 0.5062400625210136 | 0.5601227674168122 | 0.4011611762722908 | T | T | T |
| 0.3936897938852257 | 0.8080839521302311 | 0.4704223731582226 | T | T | T |
| 0.6194763247267129 | 0.5685524174813765 | 0.5376075026128677 | T | T | T |
| 0.6170941167595458 | 0.6859289614114417 | 0.2304153117216003 | F | F | F |
| 0.5059830056484316 | 0.9359289614114417 | 0.2989245614589038 | F | F | F |
| 0.3957434155251604 | 0.6845309794278516 | 0.3672097976831999 | T | T | T |
| 0.6188774577234700 | 0.9356312334845165 | 0.4320409352264527 | T | T | T |
| 0.5055967480482265 | 0.6866950836080220 | 0.5018592246041156 | T | T | T |
| 0.6170941167595458 | 0.9359289614114417 | 0.2304153117216003 | F | F | F |
| 0.5059830056484316 | 0.6859289614114417 | 0.2989245614589038 | F | F | F |
| 0.3957146733621773 | 0.9358107341607683 | 0.3669182184824200 | T | T | T |
| 0.6192797089811167 | 0.6843336504735268 | 0.4354812760628171 | T | T | T |
| 0.4999318960547557 | 0.9356861846888065 | 0.5030137647264648 | T | T | T |
| 0.3948718945373244 | 0.8109289614114417 | 0.2646699365902521 | F | F | F |
| 0.6170941167595458 | 0.5609289614114417 | 0.3331791863275555 | F | F | F |
| 0.5057009767137791 | 0.8107561757407804 | 0.4015541451774717 | T | T | T |
| 0.3967917454295335 | 0.5589604946826936 | 0.4734359414041687 | T | T | T |
| 0.6156462168805561 | 0.8167846476328220 | 0.5307351205743056 | T | T | T |
| 0.7282052278706530 | 0.5609289614114417 | 0.2646699365902521 | F | F | F |
| 0.9504274500928744 | 0.8109289614114417 | 0.3331791863275555 | F | F | F |

|                    |                    |                    |   |   |   |
|--------------------|--------------------|--------------------|---|---|---|
| 0.8409333197294997 | 0.5608211047847631 | 0.4013330196736227 | T | T | T |
| 0.7303615987919840 | 0.8108981572841142 | 0.4679598604666820 | T | T | T |
| 0.9478443602435945 | 0.5608027196218085 | 0.5322701105652885 | T | T | T |
| 0.9504274500928744 | 0.6859289614114417 | 0.2304153117216003 | F | F | F |
| 0.8393163389817673 | 0.9359289614114417 | 0.2989245614589038 | F | F | F |
| 0.7297299809214477 | 0.6855318855050946 | 0.3661770180171475 | T | T | T |
| 0.9541228825578999 | 0.9360272965838657 | 0.4342694661702457 | T | T | T |
| 0.8399365404539383 | 0.6862003485501035 | 0.5022828119636036 | T | T | T |
| 0.9504274500928744 | 0.9359289614114417 | 0.2304153117216003 | F | F | F |
| 0.8393163389817673 | 0.6859289614114417 | 0.2989245614589038 | F | F | F |
| 0.7304727964989765 | 0.9361638588186914 | 0.3658454793012518 | T | T | T |
| 0.9542146255741185 | 0.6857006720806862 | 0.4343862982695324 | T | T | T |
| 0.8397665644115615 | 0.9358871869578645 | 0.5020011577084303 | T | T | T |
| 0.7282052278706530 | 0.8109289614114417 | 0.2646699365902521 | F | F | F |
| 0.9504274500928744 | 0.5609289614114417 | 0.3331791863275555 | F | F | F |
| 0.8410842799861163 | 0.8106699958056960 | 0.4010936029011042 | T | T | T |
| 0.7308229470733170 | 0.5610115193354058 | 0.4688949303219852 | T | T | T |
| 0.9477214464187628 | 0.8108186813855861 | 0.5321965238126926 | T | T | T |
| 0.4804171151730368 | 0.2682015355850826 | 0.6846980283109176 | T | T | T |
| 0.6033127608124789 | 0.4328134215510261 | 0.6530553622028520 | T | T | T |
| 0.3941541331828039 | 0.4324028393970945 | 0.5836099690835215 | T | T | T |
| 0.4808313164189796 | 0.5975006038324520 | 0.6849017654653899 | T | T | T |
| 0.5991371086568644 | 0.7624307010060577 | 0.6452458501190044 | T | T | T |
| 0.3984646484978324 | 0.7606617049341146 | 0.5850822012472413 | T | T | T |
| 0.4804551618695988 | 0.9321373479661602 | 0.6821701881187137 | T | T | T |
| 0.5987204074814333 | 0.1028694966084853 | 0.6453288931453138 | T | T | T |
| 0.3989418664965853 | 0.1022921828879759 | 0.5858245496864053 | T | T | T |
| 0.6337472200389105 | 0.2687007318154174 | 0.6242972214708534 | T | T | T |

|                    |                    |                    |   |   |   |
|--------------------|--------------------|--------------------|---|---|---|
| 0.4072536283170565 | 0.2680661541733447 | 0.6247687459976401 | T | T | T |
| 0.5200250545262750 | 0.4325521126114985 | 0.7019346966474388 | T | T | T |
| 0.6341515383141977 | 0.5966235847978087 | 0.6243106296648048 | T | T | T |
| 0.4077088275555839 | 0.5961961147174603 | 0.6249280363514178 | T | T | T |
| 0.5195415372928283 | 0.7661121495994185 | 0.6975657195686671 | T | T | T |
| 0.6206113959749345 | 0.9330454079868146 | 0.6080837130672280 | T | T | T |
| 0.4089580536961221 | 0.9313261643226599 | 0.6209425801328828 | T | T | T |
| 0.5188054832667033 | 0.0990400636199398 | 0.6972090181961365 | T | T | T |

**Table S18.** Optimized fractional coordinates of the defective  $W_3^1(211)$  surface.

Cu Zn O

|                     |                     |                     |
|---------------------|---------------------|---------------------|
| 1.0000000000000000  |                     |                     |
| 18.9092778365208005 | 0.0000000000000000  | -0.0000000000000198 |
| 0.0000000000000000  | 10.2929071342210996 | 0.0000000000000000  |
| 0.0000000000000000  | 0.0000000000000000  | 21.6854392927720987 |

Cu Zn O  
120 9 8

Selective dynamics

Direct

|                    |                    |                    |   |   |   |
|--------------------|--------------------|--------------------|---|---|---|
| 0.0615385612039887 | 0.0609289614114417 | 0.2646699365902521 | F | F | F |
| 0.2837607834262101 | 0.3109289614114417 | 0.3331791863275555 | F | F | F |
| 0.1732704361826446 | 0.0613587169916729 | 0.4022222166273787 | T | T | T |
| 0.0636662685061342 | 0.3118031257386776 | 0.4720565370705457 | T | T | T |
| 0.2797078028813230 | 0.0603509968514746 | 0.5305123919870830 | T | T | T |
| 0.2837607834262101 | 0.1859289614114417 | 0.2304153117216003 | F | F | F |
| 0.1726496723150959 | 0.4359289614114417 | 0.2989245614589038 | F | F | F |
| 0.0635600899145419 | 0.1864027109376733 | 0.3672131787613651 | T | T | T |
| 0.2871995179330224 | 0.4371533104958889 | 0.4352332095287416 | T | T | T |
| 0.1721899664251961 | 0.1876331999919504 | 0.5037984191473897 | T | T | T |
| 0.2837607834262101 | 0.4359289614114417 | 0.2304153117216003 | F | F | F |
| 0.1726496723150959 | 0.1859289614114417 | 0.2989245614589038 | F | F | F |
| 0.0634944664153523 | 0.4362642849256383 | 0.3672378507910920 | T | T | T |
| 0.2859187804575519 | 0.1880412722704892 | 0.4335354328562901 | T | T | T |
| 0.1742285603377515 | 0.4366345735747199 | 0.5045321803976165 | T | T | T |
| 0.0615385612039887 | 0.3109289614114417 | 0.2646699365902521 | F | F | F |
| 0.2837607834262101 | 0.0609289614114417 | 0.3331791863275555 | F | F | F |
| 0.1737710538340965 | 0.3118512387285013 | 0.4023440927860780 | T | T | T |

|                    |                    |                    |   |   |   |
|--------------------|--------------------|--------------------|---|---|---|
| 0.0629594905361104 | 0.0614902422659168 | 0.4717873518407043 | T | T | T |
| 0.2830203192795424 | 0.3095220466949468 | 0.5336638778288965 | T | T | T |
| 0.3948718945373244 | 0.0609289614114417 | 0.2646699365902521 | F | F | F |
| 0.6170941167595458 | 0.3109289614114417 | 0.3331791863275555 | F | F | F |
| 0.5062455842164435 | 0.0613293982737143 | 0.4023107349090848 | T | T | T |
| 0.3972664582284933 | 0.3144512287122605 | 0.4738510817700146 | T | T | T |
| 0.6165579274605912 | 0.0571248615651473 | 0.5311788387185289 | T | T | T |
| 0.6170941167595458 | 0.1859289614114417 | 0.2304153117216003 | F | F | F |
| 0.5059830056484316 | 0.4359289614114417 | 0.2989245614589038 | F | F | F |
| 0.3966666291857970 | 0.1881048321584913 | 0.3673977386772007 | T | T | T |
| 0.6201106312557464 | 0.4363899600458502 | 0.4371256637300654 | T | T | T |
| 0.5060961413749078 | 0.1865403395279108 | 0.5025635411040130 | T | T | T |
| 0.6170941167595458 | 0.4359289614114417 | 0.2304153117216003 | F | F | F |
| 0.5059830056484316 | 0.1859289614114417 | 0.2989245614589038 | F | F | F |
| 0.3964880222931876 | 0.4369823753813708 | 0.3677721883221071 | T | T | T |
| 0.6197853666353110 | 0.1872149847475187 | 0.4350973500248008 | T | T | T |
| 0.5100094012053370 | 0.4369444791834343 | 0.5057429417680643 | T | T | T |
| 0.3948718945373244 | 0.3109289614114417 | 0.2646699365902521 | F | F | F |
| 0.6170941167595458 | 0.0609289614114417 | 0.3331791863275555 | F | F | F |
| 0.5069229207198032 | 0.3132663002172774 | 0.4022873097450455 | T | T | T |
| 0.3944330004167484 | 0.0640832617229884 | 0.4709775341491642 | T | T | T |
| 0.6233765024536554 | 0.3080694758746482 | 0.5353984678314672 | T | T | T |
| 0.7282052278706530 | 0.0609289614114417 | 0.2646699365902521 | F | F | F |
| 0.9504274500928744 | 0.3109289614114417 | 0.3331791863275555 | F | F | F |
| 0.8409264497797309 | 0.0610391683527380 | 0.4010746356069479 | T | T | T |
| 0.7322773421783023 | 0.3111899213732711 | 0.4682440098943997 | T | T | T |
| 0.9485521808581040 | 0.0608326288596501 | 0.5322885720013933 | T | T | T |
| 0.9504274500928744 | 0.1859289614114417 | 0.2304153117216003 | F | F | F |



|                    |                    |                    |   |   |   |
|--------------------|--------------------|--------------------|---|---|---|
| 0.8393163389817673 | 0.4359289614114417 | 0.2989245614589038 | F | F | F |
| 0.7297696399039044 | 0.1867037671456570 | 0.3659255345678194 | T | T | T |
| 0.9543244417681318 | 0.4362727296704168 | 0.4343599956162879 | T | T | T |
| 0.8405098774196454 | 0.1856936414451796 | 0.5026135803929573 | T | T | T |
| 0.9504274500928744 | 0.4359289614114417 | 0.2304153117216003 | F | F | F |
| 0.8393163389817673 | 0.1859289614114417 | 0.2989245614589038 | F | F | F |
| 0.7294579758616450 | 0.4368317571115409 | 0.3667788605973357 | T | T | T |
| 0.9544270106422184 | 0.1864241820402887 | 0.4343312260416053 | T | T | T |
| 0.8406028895693497 | 0.4364349837772908 | 0.5030329584893569 | T | T | T |
| 0.7282052278706530 | 0.3109289614114417 | 0.2646699365902521 | F | F | F |
| 0.9504274500928744 | 0.0609289614114417 | 0.3331791863275555 | F | F | F |
| 0.8411547601335126 | 0.3110217601471026 | 0.4011493121344177 | T | T | T |
| 0.7309261873377140 | 0.0604316917947588 | 0.4681810126478176 | T | T | T |
| 0.9485635894815659 | 0.3106744880853465 | 0.5322065070337799 | T | T | T |
| 0.0615385612039887 | 0.5609289614114417 | 0.2646699365902521 | F | F | F |
| 0.2837607834262101 | 0.8109289614114417 | 0.3331791863275555 | F | F | F |
| 0.1738804593414532 | 0.5606471211779060 | 0.4024077373327201 | T | T | T |
| 0.0631110194629238 | 0.8101111454438814 | 0.4718398373617059 | T | T | T |
| 0.2840994564628038 | 0.5624354212460480 | 0.5349633323023124 | T | T | T |
| 0.2837607834262101 | 0.6859289614114417 | 0.2304153117216003 | F | F | F |
| 0.1726496723150959 | 0.9359289614114417 | 0.2989245614589038 | F | F | F |
| 0.0634930577376970 | 0.6858665350941773 | 0.3672418950036107 | T | T | T |
| 0.2857014758559051 | 0.9360840879410577 | 0.4326381711963065 | T | T | T |
| 0.1727879944050007 | 0.6845653000988819 | 0.5042033203967117 | T | T | T |
| 0.2837607834262101 | 0.9359289614114417 | 0.2304153117216003 | F | F | F |
| 0.1726496723150959 | 0.6859289614114417 | 0.2989245614589038 | F | F | F |
| 0.0635938835346044 | 0.9360713839983721 | 0.3671815635759942 | T | T | T |
| 0.2866303887372712 | 0.6845022443511362 | 0.4342903709905653 | T | T | T |

|                    |                    |                    |   |   |   |
|--------------------|--------------------|--------------------|---|---|---|
| 0.1709171739914460 | 0.9360969306545533 | 0.5034493999441810 | T | T | T |
| 0.0615385612039887 | 0.8109289614114417 | 0.2646699365902521 | F | F | F |
| 0.2837607834262101 | 0.5609289614114417 | 0.3331791863275555 | F | F | F |
| 0.1735173326582366 | 0.8104163391454916 | 0.4024054189699358 | T | T | T |
| 0.0637127545985008 | 0.5604015269803684 | 0.4720924187587435 | T | T | T |
| 0.2798305023118791 | 0.8125110957947689 | 0.5308443966977653 | T | T | T |
| 0.3948718945373244 | 0.5609289614114417 | 0.2646699365902521 | F | F | F |
| 0.6170941167595458 | 0.8109289614114417 | 0.3331791863275555 | F | F | F |
| 0.5070910429552711 | 0.5618172145070632 | 0.4028159160289708 | T | T | T |
| 0.3951471972018076 | 0.8092860606254511 | 0.4715704568604373 | T | T | T |
| 0.6157606692340563 | 0.5718813414694081 | 0.5401692957589811 | T | T | T |
| 0.6170941167595458 | 0.6859289614114417 | 0.2304153117216003 | F | F | F |
| 0.5059830056484316 | 0.9359289614114417 | 0.2989245614589038 | F | F | F |
| 0.3965256579628422 | 0.6853944185125650 | 0.3675070796987682 | T | T | T |
| 0.6195785846596185 | 0.9375576624563754 | 0.4317905567309816 | T | T | T |
| 0.5074735228533295 | 0.6915705417220802 | 0.5064873353037519 | T | T | T |
| 0.6170941167595458 | 0.9359289614114417 | 0.2304153117216003 | F | F | F |
| 0.5059830056484316 | 0.6859289614114417 | 0.2989245614589038 | F | F | F |
| 0.3966320183843866 | 0.9361424585916543 | 0.3673637320818873 | T | T | T |
| 0.6201849076150071 | 0.6859595373051218 | 0.4348113640020246 | T | T | T |
| 0.5023089755252181 | 0.9377070395308199 | 0.5038613296556221 | T | T | T |
| 0.3948718945373244 | 0.8109289614114417 | 0.2646699365902521 | F | F | F |
| 0.6170941167595458 | 0.5609289614114417 | 0.3331791863275555 | F | F | F |
| 0.5067240960061703 | 0.8106766307265497 | 0.4027527372259749 | T | T | T |
| 0.3986245632974117 | 0.5607174757634745 | 0.4749991887975933 | T | T | T |
| 0.6253878262472178 | 0.8169944318331817 | 0.5286516593747514 | T | T | T |
| 0.7282052278706530 | 0.5609289614114417 | 0.2646699365902521 | F | F | F |
| 0.9504274500928744 | 0.8109289614114417 | 0.3331791863275555 | F | F | F |

|                    |                    |                    |   |   |   |
|--------------------|--------------------|--------------------|---|---|---|
| 0.8401727303594188 | 0.5608479183605224 | 0.4017350087254245 | T | T | T |
| 0.7337634037704379 | 0.8100629638159863 | 0.4669306620008072 | T | T | T |
| 0.9490124495682299 | 0.5607078121985368 | 0.5324482016294930 | T | T | T |
| 0.9504274500928744 | 0.6859289614114417 | 0.2304153117216003 | F | F | F |
| 0.8393163389817673 | 0.9359289614114417 | 0.2989245614589038 | F | F | F |
| 0.7301122253360383 | 0.6846186583053009 | 0.3661080670322033 | T | T | T |
| 0.9545230210627634 | 0.9360518871060076 | 0.4342498059824448 | T | T | T |
| 0.8408479344141361 | 0.6853820679214507 | 0.5030394020574199 | T | T | T |
| 0.9504274500928744 | 0.9359289614114417 | 0.2304153117216003 | F | F | F |
| 0.8393163389817673 | 0.6859289614114417 | 0.2989245614589038 | F | F | F |
| 0.7305193764607778 | 0.9359629405097332 | 0.3655239466971593 | T | T | T |
| 0.9544120177976329 | 0.6853654908681990 | 0.4343485715728071 | T | T | T |
| 0.8408354620961482 | 0.9361023124500335 | 0.5023487707554518 | T | T | T |
| 0.7282052278706530 | 0.8109289614114417 | 0.2646699365902521 | F | F | F |
| 0.9504274500928744 | 0.5609289614114417 | 0.3331791863275555 | F | F | F |
| 0.8419572409638203 | 0.8106393998579372 | 0.4008098214802206 | T | T | T |
| 0.7299732588685131 | 0.5614410709162150 | 0.4718620167257846 | T | T | T |
| 0.9486476072699381 | 0.8107774269874470 | 0.5322149957594925 | T | T | T |
| 0.4802125656939858 | 0.2619740077861678 | 0.6854461525903053 | T | T | T |
| 0.5874425953416622 | 0.4288958282063586 | 0.6313683145104194 | T | T | T |
| 0.3933384310452600 | 0.4286189573251801 | 0.5847648989600788 | T | T | T |
| 0.4747928023085073 | 0.5925397509783263 | 0.6832050920519214 | T | T | T |
| 0.5798276510078006 | 0.7504704596923710 | 0.6237579245476053 | T | T | T |
| 0.3965616212632162 | 0.7593165487965845 | 0.5867939850741725 | T | T | T |
| 0.4822149317385508 | 0.9301194194147542 | 0.6822528497089662 | T | T | T |
| 0.5990890918251187 | 0.1012423758277096 | 0.6481429048547154 | T | T | T |
| 0.3984982368149066 | 0.0989122290103826 | 0.5864657501252447 | T | T | T |
| 0.6327241379585899 | 0.2633507096787320 | 0.6219431026805445 | T | T | T |

|                    |                    |                    |   |   |   |
|--------------------|--------------------|--------------------|---|---|---|
| 0.4065579058250781 | 0.2640665790446191 | 0.6260786234250476 | T | T | T |
| 0.5195245837700659 | 0.4312936583366749 | 0.6950967792652589 | T | T | T |
| 0.3979579639335792 | 0.5934553421496240 | 0.6272337398221608 | T | T | T |
| 0.5187941758962334 | 0.7578973801892405 | 0.6913028097645478 | T | T | T |
| 0.6140971083708096 | 0.9376853589890194 | 0.6053483145713369 | T | T | T |
| 0.4084009456062700 | 0.9293963832883193 | 0.6230169211351692 | T | T | T |
| 0.5195171192944256 | 0.0956067704002814 | 0.7008998669311129 | T | T | T |

**Table S19.** Optimized fractional coordinates of the perfect  $W_2^1(211)$  surface.

Cu Zn O

|                     |                      |                      |
|---------------------|----------------------|----------------------|
| 1.0000000000000000  |                      |                      |
| 10.9172766490966993 | -10.9172766490966993 | -10.9172766490966993 |
| 0.0000000000000000  | 7.2781844327311198   | -7.2781844327311198  |
| 17.7060870384642008 | 8.8530435192321200   | 8.8530435192321200   |

|     |    |   |
|-----|----|---|
| Cu  | Zn | O |
| 120 | 6  | 6 |

Selective dynamics

Direct

|                    |                    |                    |   |   |   |
|--------------------|--------------------|--------------------|---|---|---|
| 0.0580927071224764 | 0.0659547220969969 | 0.2648195863595220 | F | F | F |
| 0.2803149293446978 | 0.3159547220969969 | 0.3333288360968183 | F | F | F |
| 0.1700143137403800 | 0.0654231244270984 | 0.4025656698257799 | T | T | T |
| 0.0600638170098911 | 0.3151326875260517 | 0.4724324563157222 | T | T | T |
| 0.2825137878474278 | 0.0657914772021795 | 0.5356546716963998 | T | T | T |
| 0.2803149293446978 | 0.1909547220969969 | 0.2305649614908702 | F | F | F |
| 0.1692038182335835 | 0.4409547220969969 | 0.2990742112281666 | F | F | F |
| 0.0598878989836121 | 0.1905187664785196 | 0.3675456430910918 | T | T | T |
| 0.2811593557621745 | 0.4403187709635156 | 0.4333678289519747 | T | T | T |
| 0.1707602633451957 | 0.1896410973398616 | 0.5044200013860064 | T | T | T |
| 0.2803149293446978 | 0.4409547220969969 | 0.2305649614908702 | F | F | F |
| 0.1692038182335835 | 0.1909547220969969 | 0.2990742112281666 | F | F | F |
| 0.0597939803871249 | 0.4406398353135444 | 0.3674646909021262 | T | T | T |
| 0.2816444313943843 | 0.1892308224589928 | 0.4343534248512038 | T | T | T |
| 0.1696925837912385 | 0.4404464057146001 | 0.5039101131195801 | T | T | T |
| 0.0580927071224764 | 0.3159547220969969 | 0.2648195863595220 | F | F | F |
| 0.2803149293446978 | 0.0659547220969969 | 0.3333288360968183 | F | F | F |
| 0.1696923720486086 | 0.3152721145049974 | 0.4024715136304137 | T | T | T |

|                    |                    |                    |   |   |   |
|--------------------|--------------------|--------------------|---|---|---|
| 0.0606947437828076 | 0.0655428855122133 | 0.4725213955848795 | T | T | T |
| 0.2798594892467379 | 0.3158632043647528 | 0.5327538075697145 | T | T | T |
| 0.3914260404558050 | 0.0659547220969969 | 0.2648195863595220 | F | F | F |
| 0.6136482626780264 | 0.3159547220969969 | 0.3333288360968183 | F | F | F |
| 0.5030722701278025 | 0.0650466521217192 | 0.3997691798417869 | T | T | T |
| 0.3907167519102476 | 0.3126713779068874 | 0.4692672928772355 | T | T | T |
| 0.6174652828798669 | 0.0582834462067215 | 0.5313765463888446 | T | T | T |
| 0.6136482626780264 | 0.1909547220969969 | 0.2305649614908702 | F | F | F |
| 0.5025371515669192 | 0.4409547220969969 | 0.2990742112281666 | F | F | F |
| 0.3920253614674194 | 0.1895361868092136 | 0.3667750304495613 | T | T | T |
| 0.6145974026260215 | 0.4398521449991990 | 0.4398693216772439 | T | T | T |
| 0.5027444623253994 | 0.1891420289100856 | 0.4981285806881149 | T | T | T |
| 0.6136482626780264 | 0.4409547220969969 | 0.2305649614908702 | F | F | F |
| 0.5025371515669192 | 0.1909547220969969 | 0.2990742112281666 | F | F | F |
| 0.3919382749935891 | 0.4403408991056064 | 0.3666229595491245 | T | T | T |
| 0.6168746443088415 | 0.1906051624034758 | 0.4355991210623060 | T | T | T |
| 0.4982099790299775 | 0.4391998519934793 | 0.5032468066768332 | T | T | T |
| 0.3914260404558050 | 0.3159547220969969 | 0.2648195863595220 | F | F | F |
| 0.6136482626780264 | 0.0659547220969969 | 0.3333288360968183 | F | F | F |
| 0.5027199963551474 | 0.3167958464549551 | 0.4006326887827237 | T | T | T |
| 0.3925679513352606 | 0.0637153680540787 | 0.4723058020592691 | T | T | T |
| 0.6114459022821592 | 0.3049978969661044 | 0.5390771508575660 | T | T | T |
| 0.7247593737891407 | 0.0659547220969969 | 0.2648195863595220 | F | F | F |
| 0.9469815960113621 | 0.3159547220969969 | 0.3333288360968183 | F | F | F |
| 0.8379753958036901 | 0.0660059971247354 | 0.4010590785152258 | T | T | T |
| 0.7253480040620816 | 0.3150861222302109 | 0.4716510732682839 | T | T | T |
| 0.9449472085384167 | 0.0658737665106879 | 0.5322722861163047 | T | T | T |
| 0.9469815960113621 | 0.1909547220969969 | 0.2305649614908702 | F | F | F |

|                    |                    |                    |   |   |   |
|--------------------|--------------------|--------------------|---|---|---|
| 0.8358704849002550 | 0.4409547220969969 | 0.2990742112281666 | F | F | F |
| 0.7267214988595413 | 0.1918607569097788 | 0.3664979427066848 | T | T | T |
| 0.9506514369423174 | 0.4405948961275075 | 0.4343347518128075 | T | T | T |
| 0.8367517284729061 | 0.1904163123921855 | 0.5023418346228450 | T | T | T |
| 0.9469815960113621 | 0.4409547220969969 | 0.2305649614908702 | F | F | F |
| 0.8358704849002550 | 0.1909547220969969 | 0.2990742112281666 | F | F | F |
| 0.7253490540279229 | 0.4407943267624868 | 0.3679883843336346 | T | T | T |
| 0.9509803506451812 | 0.1906486291030233 | 0.4344660675376522 | T | T | T |
| 0.8359646882071602 | 0.4405380250457535 | 0.5023928178405563 | T | T | T |
| 0.7247593737891407 | 0.3159547220969969 | 0.2648195863595220 | F | F | F |
| 0.9469815960113621 | 0.0659547220969969 | 0.3333288360968183 | F | F | F |
| 0.8367190267191801 | 0.3159467127217196 | 0.4016387014076470 | T | T | T |
| 0.7280376789757342 | 0.0653586481141468 | 0.4685035366401672 | T | T | T |
| 0.9442445419452703 | 0.3160388795302009 | 0.5322143363711236 | T | T | T |
| 0.0580927071224764 | 0.5659547220969969 | 0.2648195863595220 | F | F | F |
| 0.2803149293446978 | 0.8159547220969969 | 0.3333288360968183 | F | F | F |
| 0.1695945195625377 | 0.5658979943999451 | 0.4024647013341546 | T | T | T |
| 0.0605821649686085 | 0.8159540348571478 | 0.4725258447147366 | T | T | T |
| 0.2796338241390677 | 0.5655681836478399 | 0.5324248142996535 | T | T | T |
| 0.2803149293446978 | 0.6909547220969969 | 0.2305649614908702 | F | F | F |
| 0.1692038182335835 | 0.9409547220969969 | 0.2990742112281666 | F | F | F |
| 0.0598988719275057 | 0.6909175606385826 | 0.3675589346515975 | T | T | T |
| 0.2820264077876093 | 0.9406914145271891 | 0.4350127263982351 | T | T | T |
| 0.1704188590136664 | 0.6913521424436776 | 0.5043076786726296 | T | T | T |
| 0.2803149293446978 | 0.9409547220969969 | 0.2305649614908702 | F | F | F |
| 0.1692038182335835 | 0.6909547220969969 | 0.2990742112281666 | F | F | F |
| 0.0600101719499008 | 0.9407371742509865 | 0.3675330333330596 | T | T | T |
| 0.2815063029304634 | 0.6915877036905962 | 0.4340387895776585 | T | T | T |

|                    |                    |                    |   |   |   |
|--------------------|--------------------|--------------------|---|---|---|
| 0.1713862567651265 | 0.9406776020483398 | 0.5048861786987140 | T | T | T |
| 0.0580927071224764 | 0.8159547220969969 | 0.2648195863595220 | F | F | F |
| 0.2803149293446978 | 0.5659547220969969 | 0.3333288360968183 | F | F | F |
| 0.1700034990168504 | 0.8160024979617493 | 0.4025662736659928 | T | T | T |
| 0.0599177312292373 | 0.5658949575005184 | 0.4723685318029244 | T | T | T |
| 0.2818299716488630 | 0.8154868323469691 | 0.5350014983191946 | T | T | T |
| 0.3914260404558050 | 0.5659547220969969 | 0.2648195863595220 | F | F | F |
| 0.6136482626780264 | 0.8159547220969969 | 0.3333288360968183 | F | F | F |
| 0.5026908278723671 | 0.5634858812718513 | 0.4008246275198174 | T | T | T |
| 0.3921640039762529 | 0.8165157557767848 | 0.4718414002010496 | T | T | T |
| 0.6104135026272807 | 0.5707852343367134 | 0.5394215655809123 | T | T | T |
| 0.6136482626780264 | 0.6909547220969969 | 0.2305649614908702 | F | F | F |
| 0.5025371515669192 | 0.9409547220969969 | 0.2990742112281666 | F | F | F |
| 0.3920653392156811 | 0.6911429093434890 | 0.3667656298004391 | T | T | T |
| 0.6168998626397133 | 0.9399104077933730 | 0.4323802141401978 | T | T | T |
| 0.5017742805914869 | 0.6897817242527061 | 0.4984262188342803 | T | T | T |
| 0.6136482626780264 | 0.9409547220969969 | 0.2305649614908702 | F | F | F |
| 0.5025371515669192 | 0.6909547220969969 | 0.2990742112281666 | F | F | F |
| 0.3917820472820391 | 0.9404573647440975 | 0.3670485197869150 | T | T | T |
| 0.6165635530817702 | 0.6890469307190898 | 0.4359446528441944 | T | T | T |
| 0.5036862868874672 | 0.9396210187330885 | 0.4990158519448169 | T | T | T |
| 0.3914260404558050 | 0.8159547220969969 | 0.2648195863595220 | F | F | F |
| 0.6136482626780264 | 0.5659547220969969 | 0.3333288360968183 | F | F | F |
| 0.5029312049943063 | 0.8148803203363307 | 0.3998388367427497 | T | T | T |
| 0.3904146980857618 | 0.5666738192402243 | 0.4691457028211907 | T | T | T |
| 0.6165622686494947 | 0.8187554810002291 | 0.5316800930817095 | T | T | T |
| 0.7247593737891407 | 0.5659547220969969 | 0.2648195863595220 | F | F | F |
| 0.9469815960113621 | 0.8159547220969969 | 0.3333288360968183 | F | F | F |



|                    |                    |                    |   |   |   |
|--------------------|--------------------|--------------------|---|---|---|
| 0.8365255871094398 | 0.5656068084297941 | 0.4017100417510687 | T | T | T |
| 0.7276433249829289 | 0.8158654214530013 | 0.4687286341638686 | T | T | T |
| 0.9441589661947968 | 0.5652834177807544 | 0.5322243445845791 | T | T | T |
| 0.9469815960113621 | 0.6909547220969969 | 0.2305649614908702 | F | F | F |
| 0.8358704849002550 | 0.9409547220969969 | 0.2990742112281666 | F | F | F |
| 0.7265456690828553 | 0.6897005798279932 | 0.3666529047451543 | T | T | T |
| 0.9512772122118823 | 0.9406515122241309 | 0.4345167877399824 | T | T | T |
| 0.8365149788926435 | 0.6906235340254918 | 0.5023201791647417 | T | T | T |
| 0.9469815960113621 | 0.9409547220969969 | 0.2305649614908702 | F | F | F |
| 0.8358704849002550 | 0.6909547220969969 | 0.2990742112281666 | F | F | F |
| 0.7275923425941507 | 0.9406397223958272 | 0.3658549669789963 | T | T | T |
| 0.9509153941999186 | 0.6905527616519114 | 0.4344293702649943 | T | T | T |
| 0.8372910678855052 | 0.9404598991066639 | 0.5021844644656254 | T | T | T |
| 0.7247593737891407 | 0.8159547220969969 | 0.2648195863595220 | F | F | F |
| 0.9469815960113621 | 0.5659547220969969 | 0.3333288360968183 | F | F | F |
| 0.8378802867837974 | 0.8155273449880778 | 0.4011089348796325 | T | T | T |
| 0.7250256258219168 | 0.5659118067435362 | 0.4719493421889265 | T | T | T |
| 0.9448215407111317 | 0.8151337166785713 | 0.5322445796027104 | T | T | T |
| 0.3991282882521088 | 0.2597812313184371 | 0.5847148239091768 | T | T | T |
| 0.5343163021987494 | 0.4321392801913124 | 0.6269882418427610 | T | T | T |
| 0.4005869979960497 | 0.6016466268666647 | 0.5852073525115731 | T | T | T |
| 0.5300210059579147 | 0.7618961208737089 | 0.6197018975798936 | T | T | T |
| 0.3953357689042586 | 0.9322342043996702 | 0.5847032696529574 | T | T | T |
| 0.5290901978611912 | 0.1039652336873951 | 0.6193254767298638 | T | T | T |
| 0.5781980531464782 | 0.2653750534356542 | 0.6221310319015648 | T | T | T |
| 0.4347288142504086 | 0.4306755170362210 | 0.6101506189957500 | T | T | T |
| 0.5777771768442802 | 0.5993298283700915 | 0.6234768139545681 | T | T | T |
| 0.4300262044983852 | 0.7678847620705395 | 0.6181735461077731 | T | T | T |

|                    |                    |                    |   |   |   |
|--------------------|--------------------|--------------------|---|---|---|
| 0.5752298849672468 | 0.9340909450881405 | 0.6005387125016580 | T | T | T |
| 0.4292693159688499 | 0.0956748452208204 | 0.6193601345328442 | T | T | T |

**Table S20.** Optimized fractional coordinates of the defective  $W_2^1(211)$  surface.

Cu Zn O

|                     |                     |                     |
|---------------------|---------------------|---------------------|
| 1.0000000000000000  |                     |                     |
| 18.9092778365208005 | 0.0000000000000000  | -0.0000000000000198 |
| 0.0000000000000000  | 10.2929071342210996 | 0.0000000000000000  |
| 0.0000000000000000  | 0.0000000000000000  | 21.6854392927720987 |

|     |    |   |
|-----|----|---|
| Cu  | Zn | O |
| 120 | 6  | 5 |

Selective dynamics

Direct

|                    |                    |                    |   |   |   |
|--------------------|--------------------|--------------------|---|---|---|
| 0.0580927071224764 | 0.0659547220969969 | 0.2648195863595220 | F | F | F |
| 0.2803149293446978 | 0.3159547220969969 | 0.3333288360968183 | F | F | F |
| 0.1699894446299635 | 0.0652341950415170 | 0.4025373856230395 | T | T | T |
| 0.0599375448796222 | 0.3161961589686039 | 0.4723332353294508 | T | T | T |
| 0.2795139516983391 | 0.0670590006738736 | 0.5330481514940089 | T | T | T |
| 0.2803149293446978 | 0.1909547220969969 | 0.2305649614908702 | F | F | F |
| 0.1692038182335835 | 0.4409547220969969 | 0.2990742112281666 | F | F | F |
| 0.0600443896822902 | 0.1906725387486705 | 0.3676660627525399 | T | T | T |
| 0.2821731926756684 | 0.4421688660567554 | 0.4339555860355531 | T | T | T |
| 0.1692655045477369 | 0.1903729995634785 | 0.5036764114861960 | T | T | T |
| 0.2803149293446978 | 0.4409547220969969 | 0.2305649614908702 | F | F | F |
| 0.1692038182335835 | 0.1909547220969969 | 0.2990742112281666 | F | F | F |
| 0.0599575722606143 | 0.4410136731592483 | 0.3675856199448609 | T | T | T |
| 0.2817017636335605 | 0.1904068577414411 | 0.4333061656083701 | T | T | T |
| 0.1701204710470117 | 0.4421518779372197 | 0.5042292958994635 | T | T | T |
| 0.0580927071224764 | 0.3159547220969969 | 0.2648195863595220 | F | F | F |
| 0.2803149293446978 | 0.0659547220969969 | 0.3333288360968183 | F | F | F |
| 0.1698679322924827 | 0.3163465794103200 | 0.4025651719084012 | T | T | T |

|                    |                    |                    |   |   |   |
|--------------------|--------------------|--------------------|---|---|---|
| 0.0602109103873350 | 0.0650961247247767 | 0.4723997078855941 | T | T | T |
| 0.2783930912924247 | 0.3157364444969811 | 0.5319301285110087 | T | T | T |
| 0.3914260404558050 | 0.0659547220969969 | 0.2648195863595220 | F | F | F |
| 0.6136482626780264 | 0.3159547220969969 | 0.3333288360968183 | F | F | F |
| 0.5033260483856905 | 0.0665305180689756 | 0.4002286103509972 | T | T | T |
| 0.3910441000046987 | 0.3163032657426945 | 0.4702724346574505 | T | T | T |
| 0.6134233205756991 | 0.0522552608618285 | 0.5389974214284253 | T | T | T |
| 0.6136482626780264 | 0.1909547220969969 | 0.2305649614908702 | F | F | F |
| 0.5025371515669192 | 0.4409547220969969 | 0.2990742112281666 | F | F | F |
| 0.3923831065527782 | 0.1904221894969446 | 0.3669788733233034 | T | T | T |
| 0.6171448000469759 | 0.4366494700469752 | 0.4359096483588584 | T | T | T |
| 0.5007201796717272 | 0.1895868644445413 | 0.5018589082248969 | T | T | T |
| 0.6136482626780264 | 0.4409547220969969 | 0.2305649614908702 | F | F | F |
| 0.5025371515669192 | 0.1909547220969969 | 0.2990742112281666 | F | F | F |
| 0.3926426903614176 | 0.4416156315676553 | 0.3672707219619300 | T | T | T |
| 0.6158952386034957 | 0.1887933734777344 | 0.4396053569170173 | T | T | T |
| 0.5026149387890947 | 0.4400730362614131 | 0.4983241295505599 | T | T | T |
| 0.3914260404558050 | 0.3159547220969969 | 0.2648195863595220 | F | F | F |
| 0.6136482626780264 | 0.0659547220969969 | 0.3333288360968183 | F | F | F |
| 0.5032445133484583 | 0.3145057368423327 | 0.4007034018710206 | T | T | T |
| 0.3917540075131385 | 0.0634645628431626 | 0.4707989164114620 | T | T | T |
| 0.6116754008996771 | 0.3171320002131527 | 0.5404944764730997 | T | T | T |
| 0.7247593737891407 | 0.0659547220969969 | 0.2648195863595220 | F | F | F |
| 0.9469815960113621 | 0.3159547220969969 | 0.3333288360968183 | F | F | F |
| 0.8367445332023998 | 0.0660981726555981 | 0.4019642674920711 | T | T | T |
| 0.7257854333527850 | 0.3155550515123281 | 0.4724723785332067 | T | T | T |
| 0.9450778081400865 | 0.0661331412683622 | 0.5324927160330188 | T | T | T |
| 0.9469815960113621 | 0.1909547220969969 | 0.2305649614908702 | F | F | F |

|                    |                    |                    |   |   |   |
|--------------------|--------------------|--------------------|---|---|---|
| 0.8358704849002550 | 0.4409547220969969 | 0.2990742112281666 | F | F | F |
| 0.7253686955041593 | 0.1909792430679038 | 0.3676241439538881 | T | T | T |
| 0.9508484957344253 | 0.4407756903114508 | 0.4345076211287772 | T | T | T |
| 0.8364114572756465 | 0.1905058499076503 | 0.5032930923399234 | T | T | T |
| 0.9469815960113621 | 0.4409547220969969 | 0.2305649614908702 | F | F | F |
| 0.8358704849002550 | 0.1909547220969969 | 0.2990742112281666 | F | F | F |
| 0.7264999034232887 | 0.4405114741544636 | 0.3672612459979400 | T | T | T |
| 0.9507685951453285 | 0.1907016266369172 | 0.4344757579861133 | T | T | T |
| 0.8367259133907553 | 0.4406224146950891 | 0.5030774869153014 | T | T | T |
| 0.7247593737891407 | 0.3159547220969969 | 0.2648195863595220 | F | F | F |
| 0.9469815960113621 | 0.0659547220969969 | 0.3333288360968183 | F | F | F |
| 0.8364749705818505 | 0.3155545349567419 | 0.4020268496436828 | T | T | T |
| 0.7262258268284453 | 0.0649884295092900 | 0.4720433706313738 | T | T | T |
| 0.9447535865412263 | 0.3154992238518240 | 0.5324324117242984 | T | T | T |
| 0.0580927071224764 | 0.5659547220969969 | 0.2648195863595220 | F | F | F |
| 0.2803149293446978 | 0.8159547220969969 | 0.3333288360968183 | F | F | F |
| 0.1702425263375256 | 0.5665800918615888 | 0.4026312700775586 | T | T | T |
| 0.0610294242568549 | 0.8153069868365171 | 0.4726177210644246 | T | T | T |
| 0.2818392713920037 | 0.5656030289075176 | 0.5347427644503847 | T | T | T |
| 0.2803149293446978 | 0.6909547220969969 | 0.2305649614908702 | F | F | F |
| 0.1692038182335835 | 0.9409547220969969 | 0.2990742112281666 | F | F | F |
| 0.0599881601671667 | 0.6908570813530464 | 0.3675659071590234 | T | T | T |
| 0.2825179533415155 | 0.9395106693404296 | 0.4347339820702627 | T | T | T |
| 0.1720149408928754 | 0.6912654964277744 | 0.5051243128961894 | T | T | T |
| 0.2803149293446978 | 0.9409547220969969 | 0.2305649614908702 | F | F | F |
| 0.1692038182335835 | 0.6909547220969969 | 0.2990742112281666 | F | F | F |
| 0.0600745364951679 | 0.9405514048910573 | 0.3676296769625225 | T | T | T |
| 0.2828740346653540 | 0.6914418529558163 | 0.4354631179200307 | T | T | T |

|                    |                    |                    |   |   |   |
|--------------------|--------------------|--------------------|---|---|---|
| 0.1711131415459501 | 0.9396276097491495 | 0.5045590687425088 | T | T | T |
| 0.0580927071224764 | 0.8159547220969969 | 0.2648195863595220 | F | F | F |
| 0.2803149293446978 | 0.5659547220969969 | 0.3333288360968183 | F | F | F |
| 0.1703418652082197 | 0.8154031580553586 | 0.4026530852084792 | T | T | T |
| 0.0607145575629399 | 0.5666132625778676 | 0.4725996247549192 | T | T | T |
| 0.2833978527191300 | 0.8168763123579229 | 0.5362608243081877 | T | T | T |
| 0.3914260404558050 | 0.5659547220969969 | 0.2648195863595220 | F | F | F |
| 0.6136482626780264 | 0.8159547220969969 | 0.3333288360968183 | F | F | F |
| 0.5036092210486370 | 0.5665148119685400 | 0.4005993577501614 | T | T | T |
| 0.3941489384946153 | 0.8142232424396151 | 0.4733222283448426 | T | T | T |
| 0.6129117872808061 | 0.5670282875515182 | 0.5328963668262395 | T | T | T |
| 0.6136482626780264 | 0.6909547220969969 | 0.2305649614908702 | F | F | F |
| 0.5025371515669192 | 0.9409547220969969 | 0.2990742112281666 | F | F | F |
| 0.3922122135420205 | 0.6910190484241854 | 0.3674574516068068 | T | T | T |
| 0.6180400755870898 | 0.9412115229264962 | 0.4343942224167973 | T | T | T |
| 0.5054608989141289 | 0.6904135965493214 | 0.5053683856083766 | T | T | T |
| 0.6136482626780264 | 0.9409547220969969 | 0.2305649614908702 | F | F | F |
| 0.5025371515669192 | 0.6909547220969969 | 0.2990742112281666 | F | F | F |
| 0.3925840520046127 | 0.9395897410123966 | 0.3673576934441661 | T | T | T |
| 0.6176941604339976 | 0.6888711258526304 | 0.4327665994691083 | T | T | T |
| 0.5045060748449435 | 0.9398144396102065 | 0.4969208520158747 | T | T | T |
| 0.3914260404558050 | 0.8159547220969969 | 0.2648195863595220 | F | F | F |
| 0.6136482626780264 | 0.5659547220969969 | 0.3333288360968183 | F | F | F |
| 0.5038357016877488 | 0.8133232934764481 | 0.4003255430156833 | T | T | T |
| 0.3933390110732287 | 0.5683471448631510 | 0.4720550323038363 | T | T | T |
| 0.6180751345295085 | 0.8055900996883815 | 0.5305179591648866 | T | T | T |
| 0.7247593737891407 | 0.5659547220969969 | 0.2648195863595220 | F | F | F |
| 0.9469815960113621 | 0.8159547220969969 | 0.3333288360968183 | F | F | F |

|                    |                    |                    |   |   |   |
|--------------------|--------------------|--------------------|---|---|---|
| 0.8372735587260417 | 0.5656636751097371 | 0.4017675202450576 | T | T | T |
| 0.7290046948839460 | 0.8150393844451232 | 0.4695352188734727 | T | T | T |
| 0.9455236767858723 | 0.5651673785107764 | 0.5324749988152462 | T | T | T |
| 0.9469815960113621 | 0.6909547220969969 | 0.2305649614908702 | F | F | F |
| 0.8358704849002550 | 0.9409547220969969 | 0.2990742112281666 | F | F | F |
| 0.7275948988473041 | 0.6904538917960387 | 0.3664735735332402 | T | T | T |
| 0.9511404323892856 | 0.9406695200964307 | 0.4346208023034510 | T | T | T |
| 0.8377001243501626 | 0.6904655521395774 | 0.5032553449759382 | T | T | T |
| 0.9469815960113621 | 0.9409547220969969 | 0.2305649614908702 | F | F | F |
| 0.8358704849002550 | 0.6909547220969969 | 0.2990742112281666 | F | F | F |
| 0.7269982341627461 | 0.9413367397525156 | 0.3664950713821147 | T | T | T |
| 0.9512352320898871 | 0.6906417836088872 | 0.4346590622867065 | T | T | T |
| 0.8373830225144517 | 0.9407358429903903 | 0.5032226158140091 | T | T | T |
| 0.7247593737891407 | 0.8159547220969969 | 0.2648195863595220 | F | F | F |
| 0.9469815960113621 | 0.5659547220969969 | 0.3333288360968183 | F | F | F |
| 0.8380124952789705 | 0.8159831865746686 | 0.4014504377813875 | T | T | T |
| 0.7270480764479795 | 0.5667138257239068 | 0.4713047910408584 | T | T | T |
| 0.9458134675488798 | 0.8157318452727620 | 0.5324637229561228 | T | T | T |
| 0.3960046376599460 | 0.3297172769677602 | 0.5883639032896986 | T | T | T |
| 0.5256499601716705 | 0.4726374377682850 | 0.6127013927713202 | T | T | T |
| 0.3973402956278009 | 0.6652444144601259 | 0.5867495938217961 | T | T | T |
| 0.5237522432558295 | 0.8546052233829124 | 0.6076518341980844 | T | T | T |
| 0.3935984585481339 | 0.9942237539352832 | 0.5866829515539603 | T | T | T |
| 0.5292088881978353 | 0.1638579557728122 | 0.6290100825796311 | T | T | T |
| 0.5796305402407873 | 0.3230221787025637 | 0.6265320585241601 | T | T | T |
| 0.4279215847147718 | 0.4973833485935691 | 0.6203884262680048 | T | T | T |
| 0.4266433473066299 | 0.8305493718435857 | 0.6220807534579003 | T | T | T |
| 0.5791434774697430 | 0.0047314202624278 | 0.6213221754726469 | T | T | T |

0.4294205150532945 0.1618690525358384 0.6164339026779940 T T T
